# Supplementary material for: Sex-specific correlation of IGFBP-2 and IGFBP-3 with vitamin D status in adults with obesity: a cross-sectional serum proteomics study
Source: PubMed Central journal article supplement (PMC6172285; doi:10.1038/s41387-018-0063-8), 2018-10-04
Supplement: 41387_2018_63_MOESM1_ESM.pdf [file 41387_2018_63_MOESM1_ESM.pdf]

expressed proteins in high vs. low vitD status (males)

| Accession | Description                                                                                                                                                                                                                                                                                                                                                                                                                                                                                                                                                                                                                                                                                                                                                                                                                                                                                                                                                                                                                                                                        | Σ#<br>Unique<br>Peptides | Mean<br>iTRAQ<br>log2ratio<br>high vs.<br>low vitD<br>status | ttest       |             |             |             |             |             |             |             |             |             |             |             |             |             |             |             |      |
|-----------|------------------------------------------------------------------------------------------------------------------------------------------------------------------------------------------------------------------------------------------------------------------------------------------------------------------------------------------------------------------------------------------------------------------------------------------------------------------------------------------------------------------------------------------------------------------------------------------------------------------------------------------------------------------------------------------------------------------------------------------------------------------------------------------------------------------------------------------------------------------------------------------------------------------------------------------------------------------------------------------------------------------------------------------------------------------------------------|--------------------------|--------------------------------------------------------------|-------------|-------------|-------------|-------------|-------------|-------------|-------------|-------------|-------------|-------------|-------------|-------------|-------------|-------------|-------------|-------------|------|
|           |                                                                                                                                                                                                                                                                                                                                                                                                                                                                                                                                                                                                                                                                                                                                                                                                                                                                                                                                                                                                                                                                                    |                          |                                                              | 117/1<br>13 | 117/1<br>14 | 117/1<br>15 | 117/1<br>16 | 118/1<br>13 | 118/1<br>14 | 118/1<br>15 | 118/1<br>16 | 119/1<br>13 | 119/1<br>14 | 119/1<br>15 | 119/1<br>16 | 121/1<br>13 | 121/1<br>14 | 121/1<br>15 | 121/1<br>16 |      |
| Q6PIV     | Solute carrier family 25 member 34 OS=Homo sapiens GN=SLC25A34 PE=2 SV=1 - Alpha-N-acetylgalactosaminide                                                                                                                                                                                                                                                                                                                                                                                                                                                                                                                                                                                                                                                                                                                                                                                                                                                                                                                                                                           | 1                        | 2.4                                                          | 2.80        | 2.44        | 2.39        | 1.32        | 2.74        | 2.39        | 2.36        | 1.29        | 4.30        | 4.00        | 3.89        | 2.81        | 1.87        | 1.54        | 1.52        | 0.43        | 0.00 |
| Q8NDV     | sialyltransferase 3 OS=Homo sapiens Dynein regulatory complex protein 1 OS=Homo sapiens Phospholipase B1, membrane-associated OS=Homo sapiens GN=PLB1 PE=1 SV=3 - 60S ribosomal protein L3-like OS=Homo sapiens GN=RPL3L PE=1 SV=3 - Apolipoprotein(a) OS=Homo sapiens GN=LPA PE=1 SV=1 - Amyloid-like protein 1 OS=Homo sapiens GN=APLP1 PE=1 SV=3 - Structural maintenance of chromosomes protein 1A OS=Homo sapiens GN=SMC1A PE=1 SV=2 - Zinc finger and BTB domain-containing protein 6 OS=Homo sapiens GN=ZBTB6 PE=2 SV=1 - Leucine-rich repeat serine/threonine-protein kinase 2 OS=Homo sapiens GN=LRRK2 Integrin alpha-3 OS=Homo sapiens GN=ITGA3 PE=1 SV=5 - Tigger transposable element-derived protein 7 OS=Homo sapiens GN=TIGD7 PE=2 SV=1 - WD repeat-containing protein 47 OS=Homo sapiens GN=WDR47 Killer cell immunoglobulin-like receptor 3DL3 OS=Homo sapiens GN=KIR3DL3 PE=2 Zinc finger protein 316 OS=Homo sapiens GN=ZNF316 PE=1 SV=1 - UPF0378 protein KIAA0100 OS=Homo sapiens GN=KIAA0100 F-box/LRR-repeat protein 4 OS=Homo sapiens GN=FBXL4 PE=1 SV=2 - | 1                        | 2.1                                                          | -1.15       | -1.93       | 0.01        | -0.24       | 3.29        | 2.53        | 4.49        | 4.25        | 2.58        | 1.88        | 3.75        | 3.50        | 2.37        | 1.62        | 3.58        | 3.32        | 0.00 |
| Q96MC     | complex protein 1 OS=Homo sapiens                                                                                                                                                                                                                                                                                                                                                                                                                                                                                                                                                                                                                                                                                                                                                                                                                                                                                                                                                                                                                                                  | 1                        | 1.6                                                          | 3.14        | 2.79        | -0.16       | -2.14       | 3.37        | 3.04        | 0.11        | -1.87       | 5.15        | 4.87        | 1.86        | -0.13       | 3.57        | 3.25        | 0.32        | -1.68       | 0.02 |
| Q6PIK     | membrane-associated OS=Homo sapiens GN=PLB1 PE=1 SV=3 - 60S ribosomal protein L3-like OS=Homo sapiens GN=RPL3L PE=1 SV=3 - Apolipoprotein(a) OS=Homo sapiens GN=LPA PE=1 SV=1 - Amyloid-like protein 1 OS=Homo sapiens GN=APLP1 PE=1 SV=3 - Structural maintenance of chromosomes protein 1A OS=Homo sapiens GN=SMC1A PE=1 SV=2 - Zinc finger and BTB domain-containing protein 6 OS=Homo sapiens GN=ZBTB6 PE=2 SV=1 - Leucine-rich repeat serine/threonine-protein kinase 2 OS=Homo sapiens GN=LRRK2 Integrin alpha-3 OS=Homo sapiens GN=ITGA3 PE=1 SV=5 - Tigger transposable element-derived protein 7 OS=Homo sapiens GN=TIGD7 PE=2 SV=1 - WD repeat-containing protein 47 OS=Homo sapiens GN=WDR47 Killer cell immunoglobulin-like receptor 3DL3 OS=Homo sapiens GN=KIR3DL3 PE=2 Zinc finger protein 316 OS=Homo sapiens GN=ZNF316 PE=1 SV=1 - UPF0378 protein KIAA0100 OS=Homo sapiens GN=KIAA0100 F-box/LRR-repeat protein 4 OS=Homo sapiens GN=FBXL4 PE=1 SV=2 -                                                                                                           | 1                        | 1.5                                                          | 1.05        | -0.36       | 1.02        | 0.66        | 0.82        | -0.56       | 0.84        | 0.49        | 0.73        | -0.60       | 0.72        | 0.35        | 5.22        | 3.84        | 5.25        | 4.88        | 0.01 |
| Q9290     | like OS=Homo sapiens GN=RPL3L PE=1 SV=3 - Apolipoprotein(a) OS=Homo sapiens GN=LPA PE=1 SV=1 - Amyloid-like protein 1 OS=Homo sapiens GN=APLP1 PE=1 SV=3 - Structural maintenance of chromosomes protein 1A OS=Homo sapiens GN=SMC1A PE=1 SV=2 - Zinc finger and BTB domain-containing protein 6 OS=Homo sapiens GN=ZBTB6 PE=2 SV=1 - Leucine-rich repeat serine/threonine-protein kinase 2 OS=Homo sapiens GN=LRRK2 Integrin alpha-3 OS=Homo sapiens GN=ITGA3 PE=1 SV=5 - Tigger transposable element-derived protein 7 OS=Homo sapiens GN=TIGD7 PE=2 SV=1 - WD repeat-containing protein 47 OS=Homo sapiens GN=WDR47 Killer cell immunoglobulin-like receptor 3DL3 OS=Homo sapiens GN=KIR3DL3 PE=2 Zinc finger protein 316 OS=Homo sapiens GN=ZNF316 PE=1 SV=1 - UPF0378 protein KIAA0100 OS=Homo sapiens GN=KIAA0100 F-box/LRR-repeat protein 4 OS=Homo sapiens GN=FBXL4 PE=1 SV=2 -                                                                                                                                                                                            | 1                        | 1.5                                                          | 2.37        | 2.06        | 2.40        | 1.81        | 1.98        | 1.69        | 2.05        | 1.47        | 0.97        | 0.73        | 1.01        | 0.42        | 1.48        | 1.20        | 1.55        | 0.96        | 0.00 |
| P0851     | OS=Homo sapiens GN=LPA PE=1 SV=1 - Amyloid-like protein 1 OS=Homo sapiens GN=APLP1 PE=1 SV=3 - Structural maintenance of chromosomes protein 1A OS=Homo sapiens GN=SMC1A PE=1 SV=2 - Zinc finger and BTB domain-containing protein 6 OS=Homo sapiens GN=ZBTB6 PE=2 SV=1 - Leucine-rich repeat serine/threonine-protein kinase 2 OS=Homo sapiens GN=LRRK2 Integrin alpha-3 OS=Homo sapiens GN=ITGA3 PE=1 SV=5 - Tigger transposable element-derived protein 7 OS=Homo sapiens GN=TIGD7 PE=2 SV=1 - WD repeat-containing protein 47 OS=Homo sapiens GN=WDR47 Killer cell immunoglobulin-like receptor 3DL3 OS=Homo sapiens GN=KIR3DL3 PE=2 Zinc finger protein 316 OS=Homo sapiens GN=ZNF316 PE=1 SV=1 - UPF0378 protein KIAA0100 OS=Homo sapiens GN=KIAA0100 F-box/LRR-repeat protein 4 OS=Homo sapiens GN=FBXL4 PE=1 SV=2 -                                                                                                                                                                                                                                                        | 4                        | 1.5                                                          | 1.80        | 1.69        | 1.16        | 1.04        | 1.45        | 1.33        | 0.58        | 0.55        | 1.88        | 1.77        | 0.97        | 0.98        | 2.54        | 2.37        | 1.76        | 1.83        | 0.00 |
| P5169     | OS=Homo sapiens GN=APLP1 PE=1 SV=3 - Structural maintenance of chromosomes protein 1A OS=Homo sapiens GN=SMC1A PE=1 SV=2 - Zinc finger and BTB domain-containing protein 6 OS=Homo sapiens GN=ZBTB6 PE=2 SV=1 - Leucine-rich repeat serine/threonine-protein kinase 2 OS=Homo sapiens GN=LRRK2 Integrin alpha-3 OS=Homo sapiens GN=ITGA3 PE=1 SV=5 - Tigger transposable element-derived protein 7 OS=Homo sapiens GN=TIGD7 PE=2 SV=1 - WD repeat-containing protein 47 OS=Homo sapiens GN=WDR47 Killer cell immunoglobulin-like receptor 3DL3 OS=Homo sapiens GN=KIR3DL3 PE=2 Zinc finger protein 316 OS=Homo sapiens GN=ZNF316 PE=1 SV=1 - UPF0378 protein KIAA0100 OS=Homo sapiens GN=KIAA0100 F-box/LRR-repeat protein 4 OS=Homo sapiens GN=FBXL4 PE=1 SV=2 -                                                                                                                                                                                                                                                                                                                  | 1                        | 1.5                                                          | 3.79        | 2.51        | 2.67        | 1.09        | 3.20        | 1.94        | 2.11        | 0.54        | 2.54        | 1.33        | 1.42        | -0.16       | 1.30        | 0.05        | 0.23        | -1.36       | 0.00 |
| Q1468     | Structural maintenance of chromosomes protein 1A OS=Homo sapiens GN=SMC1A PE=1 SV=2 - Zinc finger and BTB domain-containing protein 6 OS=Homo sapiens GN=ZBTB6 PE=2 SV=1 - Leucine-rich repeat serine/threonine-protein kinase 2 OS=Homo sapiens GN=LRRK2 Integrin alpha-3 OS=Homo sapiens GN=ITGA3 PE=1 SV=5 - Tigger transposable element-derived protein 7 OS=Homo sapiens GN=TIGD7 PE=2 SV=1 - WD repeat-containing protein 47 OS=Homo sapiens GN=WDR47 Killer cell immunoglobulin-like receptor 3DL3 OS=Homo sapiens GN=KIR3DL3 PE=2 Zinc finger protein 316 OS=Homo sapiens GN=ZNF316 PE=1 SV=1 - UPF0378 protein KIAA0100 OS=Homo sapiens GN=KIAA0100 F-box/LRR-repeat protein 4 OS=Homo sapiens GN=FBXL4 PE=1 SV=2 -                                                                                                                                                                                                                                                                                                                                                       | 1                        | 1.4                                                          | 1.55        | 2.92        | 1.85        | 1.85        | -0.05       | 1.34        | 0.29        | 0.30        | 2.80        | 4.24        | 3.11        | 3.11        | -0.61       | 0.80        | -0.25       | -0.27       | 0.00 |
| Q1591     | domain-containing protein 6 OS=Homo sapiens GN=ZBTB6 PE=2 SV=1 - Leucine-rich repeat serine/threonine-protein kinase 2 OS=Homo sapiens GN=LRRK2 Integrin alpha-3 OS=Homo sapiens GN=ITGA3 PE=1 SV=5 - Tigger transposable element-derived protein 7 OS=Homo sapiens GN=TIGD7 PE=2 SV=1 - WD repeat-containing protein 47 OS=Homo sapiens GN=WDR47 Killer cell immunoglobulin-like receptor 3DL3 OS=Homo sapiens GN=KIR3DL3 PE=2 Zinc finger protein 316 OS=Homo sapiens GN=ZNF316 PE=1 SV=1 - UPF0378 protein KIAA0100 OS=Homo sapiens GN=KIAA0100 F-box/LRR-repeat protein 4 OS=Homo sapiens GN=FBXL4 PE=1 SV=2 -                                                                                                                                                                                                                                                                                                                                                                                                                                                                 | 1                        | 1.3                                                          | -0.01       | -0.17       | 0.03        | 0.67        | 1.40        | 1.26        | 1.49        | 2.13        | 2.51        | 2.42        | 2.56        | 3.19        | 0.70        | 0.58        | 0.80        | 1.42        | 0.00 |
| Q5500     | Leucine-rich repeat serine/threonine-protein kinase 2 OS=Homo sapiens GN=LRRK2 Integrin alpha-3 OS=Homo sapiens GN=ITGA3 PE=1 SV=5 - Tigger transposable element-derived protein 7 OS=Homo sapiens GN=TIGD7 PE=2 SV=1 - WD repeat-containing protein 47 OS=Homo sapiens GN=WDR47 Killer cell immunoglobulin-like receptor 3DL3 OS=Homo sapiens GN=KIR3DL3 PE=2 Zinc finger protein 316 OS=Homo sapiens GN=ZNF316 PE=1 SV=1 - UPF0378 protein KIAA0100 OS=Homo sapiens GN=KIAA0100 F-box/LRR-repeat protein 4 OS=Homo sapiens GN=FBXL4 PE=1 SV=2 -                                                                                                                                                                                                                                                                                                                                                                                                                                                                                                                                  | 1                        | 1.3                                                          | 0.45        | 0.30        | 0.12        | 0.91        | 4.41        | 4.27        | 4.12        | 4.92        | 0.44        | 0.35        | 0.11        | 0.90        | -0.14       | -0.27       | -0.42       | 0.36        | 0.02 |
| P2600     | OS=Homo sapiens GN=ITGA3 PE=1 SV=5 - Tigger transposable element-derived protein 7 OS=Homo sapiens GN=TIGD7 PE=2 SV=1 - WD repeat-containing protein 47 OS=Homo sapiens GN=WDR47 Killer cell immunoglobulin-like receptor 3DL3 OS=Homo sapiens GN=KIR3DL3 PE=2 Zinc finger protein 316 OS=Homo sapiens GN=ZNF316 PE=1 SV=1 - UPF0378 protein KIAA0100 OS=Homo sapiens GN=KIAA0100 F-box/LRR-repeat protein 4 OS=Homo sapiens GN=FBXL4 PE=1 SV=2 -                                                                                                                                                                                                                                                                                                                                                                                                                                                                                                                                                                                                                                  | 1                        | 1.3                                                          | 0.93        | 2.05        | 2.28        | 2.22        | 0.68        | 1.82        | 2.07        | 2.02        | -0.73       | 0.47        | 0.63        | 0.57        | 0.35        | 1.51        | 1.76        | 1.69        | 0.00 |
| Q6NT0     | element-derived protein 7 OS=Homo sapiens GN=TIGD7 PE=2 SV=1 - WD repeat-containing protein 47 OS=Homo sapiens GN=WDR47 Killer cell immunoglobulin-like receptor 3DL3 OS=Homo sapiens GN=KIR3DL3 PE=2 Zinc finger protein 316 OS=Homo sapiens GN=ZNF316 PE=1 SV=1 - UPF0378 protein KIAA0100 OS=Homo sapiens GN=KIAA0100 F-box/LRR-repeat protein 4 OS=Homo sapiens GN=FBXL4 PE=1 SV=2 -                                                                                                                                                                                                                                                                                                                                                                                                                                                                                                                                                                                                                                                                                           | 1                        | 1.2                                                          | 1.92        | 0.27        | 1.12        | 0.39        | 4.48        | 2.71        | 3.72        | 3.00        | 0.99        | -0.59       | 0.20        | -0.54       | 1.37        | -0.25       | 0.62        | -0.12       | 0.01 |
| Q9496     | protein 47 OS=Homo sapiens GN=WDR47 Killer cell immunoglobulin-like receptor 3DL3 OS=Homo sapiens GN=KIR3DL3 PE=2 Zinc finger protein 316 OS=Homo sapiens GN=ZNF316 PE=1 SV=1 - UPF0378 protein KIAA0100 OS=Homo sapiens GN=KIAA0100 F-box/LRR-repeat protein 4 OS=Homo sapiens GN=FBXL4 PE=1 SV=2 -                                                                                                                                                                                                                                                                                                                                                                                                                                                                                                                                                                                                                                                                                                                                                                               | 1                        | 1.2                                                          | 1.58        | 1.93        | 0.19        | 1.86        | 2.15        | 2.51        | 0.80        | 2.47        | 1.41        | 1.83        | 0.03        | 1.69        | 0.29        | 0.68        | -1.04       | 0.61        | 0.00 |
| Q8N74     | Killer cell immunoglobulin-like receptor 3DL3 OS=Homo sapiens GN=KIR3DL3 PE=2 Zinc finger protein 316 OS=Homo sapiens GN=ZNF316 PE=1 SV=1 - UPF0378 protein KIAA0100 OS=Homo sapiens GN=KIAA0100 F-box/LRR-repeat protein 4 OS=Homo sapiens GN=FBXL4 PE=1 SV=2 -                                                                                                                                                                                                                                                                                                                                                                                                                                                                                                                                                                                                                                                                                                                                                                                                                   | 1                        | 1.2                                                          | 3.74        | 2.29        | 0.98        | 2.64        | 3.44        | 2.01        | 0.71        | 2.38        | 1.44        | 0.06        | -1.32       | 0.34        | 1.35        | -0.07       | -1.36       | 0.29        | 0.01 |
| Q6NFI     | Zinc finger protein 316 OS=Homo sapiens GN=ZNF316 PE=1 SV=1 - UPF0378 protein KIAA0100 OS=Homo sapiens GN=KIAA0100 F-box/LRR-repeat protein 4 OS=Homo sapiens GN=FBXL4 PE=1 SV=2 -                                                                                                                                                                                                                                                                                                                                                                                                                                                                                                                                                                                                                                                                                                                                                                                                                                                                                                 | 1                        | 1.2                                                          | 0.56        | 1.64        | 0.31        | 1.10        | 1.51        | 2.61        | 1.31        | 2.10        | 0.89        | 2.04        | 0.65        | 1.43        | 0.28        | 1.39        | 0.09        | 0.86        | 0.00 |
| Q1466     | KIAA0100 OS=Homo sapiens GN=KIAA0100 F-box/LRR-repeat protein 4 OS=Homo sapiens GN=FBXL4 PE=1 SV=2 -                                                                                                                                                                                                                                                                                                                                                                                                                                                                                                                                                                                                                                                                                                                                                                                                                                                                                                                                                                               | 1                        | 1.1                                                          | 0.97        | 1.35        | 0.29        | 0.59        | 2.27        | 2.66        | 1.62        | 1.92        | 0.29        | 0.74        | -0.38       | -0.09       | 1.68        | 2.09        | 1.05        | 1.33        | 0.00 |
| Q9UKA     | F-box/LRR-repeat protein 4 OS=Homo sapiens GN=FBXL4 PE=1 SV=2 -                                                                                                                                                                                                                                                                                                                                                                                                                                                                                                                                                                                                                                                                                                                                                                                                                                                                                                                                                                                                                    | 1                        | 1.1                                                          | 1.40        | 1.22        | 1.14        | 0.94        | 1.36        | 1.20        | 1.14        | 0.95        | 1.93        | 1.82        | 1.67        | 1.47        | 0.59        | 0.44        | 0.39        | 0.17        | 0.00 |



|        |                                                                                                  |   |     |       |       |       |       |       |       |       |       |       |       |       |       |       |       |       |       |      |
|--------|--------------------------------------------------------------------------------------------------|---|-----|-------|-------|-------|-------|-------|-------|-------|-------|-------|-------|-------|-------|-------|-------|-------|-------|------|
| Q0039: | Sulfhydryl oxidase 1<br>OS=Homo sapiens<br>GN=QSOX1 PE=1 SV=3 -                                  | 2 | 0.9 | -0.56 | 0.88  | 0.89  | -0.71 | -0.33 | 1.12  | 1.16  | -0.44 | 0.54  | 2.05  | 2.00  | 0.39  | 0.94  | 2.40  | 2.44  | 0.82  | 0.00 |
| Q9UKN: | Unconventional myosin-<br>XV OS=Homo sapiens<br>GN=MYO15A PE=1                                   | 2 | 0.8 | 0.30  | 0.12  | 0.65  | 1.19  | 0.18  | -0.37 | 0.24  | 0.27  | 0.24  | 0.39  | 0.71  | 0.36  | 1.95  | 3.38  | 3.81  | -0.09 | 0.01 |
| Q9218: | Alpha-N-<br>acetylneuraminide alpha-<br>2,8-sialyltransferase<br>OS=Homo sapiens                 | 1 | 0.8 | 0.62  | 1.08  | 0.10  | 0.29  | 1.08  | 1.56  | 0.60  | 0.79  | 2.48  | 3.01  | 1.97  | 2.15  | -0.56 | -0.07 | -1.03 | -0.86 | 0.01 |
| Q9972: | BRCA1-associated RING<br>domain protein 1<br>OS=Homo sapiens<br>GN=BARD1 PE=1 SV=2 -             | 1 | 0.8 | -0.15 | -0.30 | -0.12 | -0.09 | 0.68  | 0.55  | 0.75  | 0.79  | 0.63  | 0.55  | 0.66  | 0.69  | 2.12  | 2.00  | 2.20  | 2.22  | 0.00 |
| Q9P2D: | Protein unc-79 homolog<br>OS=Homo sapiens<br>GN=UNC79 PE=2 SV=4 -                                | 2 | 0.8 | 0.65  | 1.71  | -0.06 | 0.54  | 1.31  | 2.94  | 0.95  | 1.66  | 1.32  | 1.28  | 1.31  | 0.87  | -0.75 | 0.20  | -0.85 | -0.04 | 0.00 |
| Q96JB: | Dynein heavy chain 8,<br>axonemal OS=Homo<br>sapiens GN=DNAH8                                    | 1 | 0.8 | 0.76  | 0.68  | 1.03  | 0.71  | 0.97  | 0.90  | 1.28  | 0.96  | 0.19  | 0.18  | 0.47  | 0.14  | 1.09  | 1.03  | 1.41  | 1.07  | 0.00 |
| Q1058: | ADP-ribosyl<br>cyclase/cyclic ADP-<br>ribose hydrolase 2<br>OS=Homo sapiens                      | 7 | 0.8 | 0.92  | -0.20 | 0.44  | 1.05  | 1.40  | 0.37  | 0.97  | 1.75  | 1.08  | 0.16  | 0.74  | 1.39  | 0.86  | -0.14 | 0.52  | 1.35  | 0.00 |
| Q8N6Q: | Methyltransferase-like<br>protein 25 OS=Homo<br>sapiens GN=METTL25                               | 1 | 0.8 | -0.12 | -0.26 | 1.15  | 0.30  | 1.64  | 1.53  | 2.96  | 2.11  | -0.12 | -0.18 | 1.16  | 0.31  | 0.11  | 0.01  | 1.44  | 0.57  | 0.00 |
| Q9P2S: | WD repeat-containing<br>protein WRAP73<br>OS=Homo sapiens<br>GN=WRAP73 PE=2                      | 1 | 0.8 | 1.05  | 1.19  | 0.81  | 1.18  | 0.37  | 0.53  | 0.17  | 0.55  | -0.55 | -0.34 | -0.79 | -0.42 | 2.17  | 2.34  | 1.98  | 2.34  | 0.01 |
| P1364: | Keratin, type II<br>cytoskeletal 5 OS=Homo<br>sapiens GN=KRT5 PE=1                               | 3 | 0.8 | 2.03  | 2.57  | 1.53  | 0.54  | 0.48  | 1.04  | 0.03  | -0.21 | 1.52  | 2.13  | 1.03  | -0.08 | 0.26  | 0.83  | -0.18 | -1.05 | 0.01 |
| Q96QK: | Vacuolar protein sorting-<br>associated protein 35<br>OS=Homo sapiens<br>GN=VPS35 PE=1 SV=2 -    | 1 | 0.8 | -0.26 | 0.27  | 0.62  | 1.10  | 0.95  | 1.50  | 1.87  | 2.35  | -0.17 | 0.44  | 0.72  | 1.19  | -0.30 | 0.26  | 0.63  | 1.09  | 0.00 |
| Q9P27: | Teneurin-3 OS=Homo<br>sapiens GN=TENM3<br>PE=2 SV=3 -                                            | 1 | 0.8 | -1.02 | -0.92 | -0.73 | -1.58 | 2.22  | 2.35  | 2.55  | 1.70  | 1.15  | 1.33  | 1.45  | 0.59  | 0.78  | 0.91  | 1.12  | 0.25  | 0.03 |
| P1288: | Myosin-7 OS=Homo<br>sapiens GN=MYH7 PE=1<br>SV=5 - [MYH7_HUMAN]                                  | 1 | 0.8 | -1.56 | -0.77 | 0.07  | -0.35 | 1.54  | 2.35  | 3.21  | 2.79  | 0.14  | 0.99  | 1.77  | 1.34  | -0.78 | 0.04  | 0.90  | 0.46  | 0.04 |
| Q09MP: | RAD51-associated<br>protein 2 OS=Homo<br>sapiens GN=RAD51AP2                                     | 1 | 0.8 | 0.02  | -0.25 | 0.39  | 1.77  | -0.42 | -0.66 | -0.01 | 1.38  | -0.48 | -0.67 | -0.10 | 1.28  | 1.97  | 1.74  | 2.39  | 3.76  | 0.04 |
| Q9Y6H: | Synphilin-1 OS=Homo<br>sapiens GN=SNCAIP<br>PE=1 SV=2 -                                          | 1 | 0.8 | 1.03  | 1.50  | 0.37  | -0.83 | 1.77  | 2.26  | 1.15  | -0.04 | 1.92  | 2.46  | 1.26  | 0.07  | 0.27  | 0.78  | -0.33 | -1.54 | 0.02 |
| Q17BZ: | Putative ciliary rootlet<br>coiled-coil protein-like 3<br>protein OS=Homo<br>sapiens PE=5 SV=2 - | 1 | 0.7 | 0.92  | 1.65  | 0.32  | -0.11 | 0.45  | 1.20  | -0.12 | -0.54 | 2.86  | 3.66  | 2.26  | 1.82  | -0.40 | 0.37  | -0.95 | -1.39 | 0.05 |
| P0501: | Insulin-like growth factor<br>I OS=Homo sapiens<br>GN=IGF1 PE=1 SV=1 -                           | 5 | 0.7 | 1.40  | 1.77  | 0.19  | -0.73 | 2.04  | 2.54  | 0.96  | 0.17  | 2.32  | 2.66  | 1.38  | 0.42  | -0.07 | 0.17  | -1.26 | -2.01 | 0.05 |
| Q1410: | Heterogeneous nuclear<br>ribonucleoprotein D0<br>OS=Homo sapiens<br>GN=HNRNPD PE=1               | 1 | 0.7 | 0.68  | 0.82  | 1.13  | -0.11 | 1.14  | 1.29  | 1.62  | 0.39  | 1.15  | 1.35  | 1.60  | 0.36  | 0.14  | 0.30  | 0.63  | -0.62 | 0.00 |
| Q1364: | Four and a half LIM<br>domains protein 1<br>OS=Homo sapiens<br>GN=FHL1 PE=1 SV=4 -               | 1 | 0.7 | 0.63  | 0.31  | 0.83  | 1.35  | 0.32  | 0.01  | 0.55  | 1.08  | -0.54 | -0.79 | -0.34 | 0.18  | 1.88  | 1.59  | 2.13  | 2.64  | 0.01 |
| Q0026: | Transcription elongation<br>factor SPT5 OS=Homo<br>sapiens GN=SUPT5H<br>PE=1 SV=1 -              | 1 | 0.7 | 0.81  | 0.43  | 1.55  | 0.28  | 0.08  | -0.29 | 0.85  | -0.41 | 0.97  | 0.65  | 1.70  | 0.43  | 1.21  | 0.85  | 1.99  | 0.71  | 0.00 |
| Q0359: | Complement factor H-<br>related protein 1<br>OS=Homo sapiens<br>GN=CFHR1 PE=1 SV=2 -             | 2 | 0.7 | 0.67  | 0.92  | 0.03  | 0.31  | 0.86  | 1.22  | 0.41  | 0.53  | 1.41  | 1.59  | 0.64  | 1.10  | 0.64  | 1.04  | -0.01 | 0.40  | 0.00 |

| Ornithine |                                                                                                                                                 |   |     |       |       |       |       |       |       |       |       |       |       |       |       |       |       |       |       |      |
|-----------|-------------------------------------------------------------------------------------------------------------------------------------------------|---|-----|-------|-------|-------|-------|-------|-------|-------|-------|-------|-------|-------|-------|-------|-------|-------|-------|------|
| P0048C    | carbamoyltransferase, mitochondrial OS=Homo sapiens GN=OTC PE=1 Probable E3 ubiquitin-protein ligase HERC1 OS=Homo sapiens GN=HERC1 PE=1 SV=2 - | 2 | 0.7 | 1.39  | 1.02  | 1.17  | 1.81  | 0.01  | -0.34 | -0.17 | 0.48  | 1.16  | 0.86  | 0.95  | 1.59  | 0.43  | 0.09  | 0.26  | 0.89  | 0.00 |
| Q1575:    | Mucin-12 OS=Homo sapiens GN=MUC12 PE=1 SV=2 -                                                                                                   | 1 | 0.7 | 0.43  | 0.16  | 1.08  | 1.01  | 0.61  | 0.36  | 1.30  | 1.23  | 0.08  | -0.12 | 0.74  | 0.66  | 0.66  | 0.42  | 1.37  | 1.28  | 0.00 |
| Y9UKN     | Lysosome-associated membrane glycoprotein 1 OS=Homo sapiens GN=LAMP1 PE=1 SV=3 -                                                                | 1 | 0.7 | 0.75  | 0.87  | 0.70  | 0.41  | 0.74  | 0.88  | 0.73  | 0.44  | 0.73  | 0.92  | 0.69  | 0.39  | 0.76  | 0.92  | 0.77  | 0.46  | 0.00 |
| P1127Z    | ATP-dependent RNA helicase DDX19A OS=Homo sapiens GN=DDX19A PE=1 SV=1                                                                           | 1 | 0.7 | 0.16  | 0.47  | 1.26  | 0.80  | 0.03  | 0.36  | 1.16  | 0.71  | 0.19  | 0.57  | 1.29  | 0.83  | 0.29  | 0.63  | 1.44  | 0.96  | 0.00 |
| Y9UUU     | E3 ubiquitin-protein ligase CHFR OS=Homo sapiens GN=CHFR PE=1 SV=2 -                                                                            | 1 | 0.7 | 0.90  | 1.43  | 0.62  | 0.89  | 0.95  | 1.50  | 0.71  | 0.98  | 0.39  | 0.99  | 0.11  | 0.37  | 0.21  | 0.78  | -0.02 | 0.23  | 0.00 |
| Q96EP:    | Lysosome-associated membrane glycoprotein 2 OS=Homo sapiens GN=LAMP2 PE=1 SV=2 -                                                                | 1 | 0.7 | 0.36  | 1.24  | -0.09 | -0.01 | 0.82  | 1.72  | 0.41  | 0.50  | 0.94  | 1.90  | 0.50  | 0.58  | 0.48  | 1.40  | 0.08  | 0.15  | 0.00 |
| P1347Z    | Death domain-containing protein CRADD OS=Homo sapiens GN=CRADD PE=1 SV=1                                                                        | 1 | 0.7 | 0.24  | -0.04 | 0.78  | 0.90  | 0.55  | 0.29  | 1.13  | 1.26  | 0.22  | 0.02  | 0.77  | 0.89  | 0.72  | 0.48  | 1.32  | 1.43  | 0.00 |
| P7856C    | Hemoglobin subunit gamma-1 OS=Homo sapiens GN=HBG1 PE=1                                                                                         | 1 | 0.7 | 0.58  | 0.34  | 0.43  | 0.89  | 0.19  | -0.03 | 0.08  | 0.54  | -0.21 | -0.38 | -0.36 | 0.09  | 2.19  | 1.98  | 2.09  | 2.53  | 0.01 |
| P6989I    | Protein NEDD1 OS=Homo sapiens GN=NEDD1 PE=1 SV=1 -                                                                                              | 1 | 0.7 | 1.21  | 1.79  | 1.25  | 1.22  | 0.29  | 0.89  | 0.37  | 0.34  | -0.11 | 0.54  | -0.06 | -0.10 | 0.62  | 1.23  | 0.71  | 0.67  | 0.00 |
| Y8NHV     | Ig kappa chain V-I region Bi OS=Homo sapiens PE=1 SV=1 -                                                                                        | 1 | 0.7 | 0.29  | 1.36  | 0.57  | 1.09  | 0.52  | 1.61  | 0.84  | 1.37  | -0.30 | 0.83  | 0.64  | 0.50  | -0.19 | 0.91  | 0.14  | 0.65  | 0.00 |
| P0159E    | Ig kappa chain V-II region RPMI 6410 OS=Homo sapiens PE=4                                                                                       | 2 | 0.7 | 1.36  | 0.16  | 0.94  | 0.54  | 1.51  | 0.33  | 1.13  | 0.73  | 1.19  | 0.07  | 0.75  | 0.38  | 1.01  | -0.16 | 0.64  | 0.23  | 0.00 |
| P0631C    | Ig alpha-1 chain C region OS=Homo sapiens GN=IGHA1 PE=1 SV=2 -                                                                                  | 4 | 0.7 | 0.68  | 0.57  | 0.65  | 0.50  | 0.28  | 0.31  | 0.23  | 0.32  | 1.74  | 1.67  | 1.75  | 1.52  | 0.19  | 0.08  | 0.12  | 0.17  | 0.00 |
| Y494V:    | Coiled-coil domain-containing protein 37 OS=Homo sapiens GN=CCDC37 PE=2                                                                         | 1 | 0.7 | 0.64  | 0.58  | 0.86  | 0.72  | 0.70  | 0.65  | 0.82  | 0.74  | 0.19  | 0.24  | 0.58  | 0.43  | 0.84  | 0.79  | 1.06  | 0.87  | 0.00 |
| Y4D0V     | Cadherin-like and PC-esterase domain-containing protein 1 OS=Homo sapiens                                                                       | 1 | 0.7 | 0.75  | 0.62  | 1.29  | 1.56  | 0.04  | -0.07 | 0.62  | 0.89  | -0.31 | -0.36 | 0.24  | 0.50  | 0.84  | 0.74  | 1.43  | 1.68  | 0.00 |
| Q96EY:    | Multivesicular body subunit 12A OS=Homo sapiens GN=MVB12A                                                                                       | 1 | 0.7 | 0.04  | 0.61  | 1.10  | 0.69  | -0.07 | 0.52  | 1.03  | 0.63  | 0.36  | 1.00  | 1.43  | 1.02  | -0.08 | 0.52  | 1.03  | 0.61  | 0.00 |
| P0097Z:   | 2'-5'-oligoadenylate synthase 1 OS=Homo sapiens GN=OAS1 PE=1                                                                                    | 1 | 0.6 | 0.26  | 0.85  | 0.35  | -0.29 | 0.41  | 1.02  | 0.54  | -0.09 | 0.97  | 1.63  | 1.07  | 0.43  | 0.74  | 1.36  | 0.88  | 0.23  | 0.00 |
| Y9UP9:    | Solute carrier family 12 member 4 OS=Homo sapiens GN=SLC12A4                                                                                    | 1 | 0.6 | 0.43  | 0.52  | 0.50  | 0.64  | 0.61  | 0.72  | 0.72  | 0.87  | 0.55  | 0.70  | 0.62  | 0.76  | 0.53  | 0.65  | 0.65  | 0.77  | 0.00 |
| P1415I    | L-selectin OS=Homo sapiens GN=SELL PE=1 SV=2 -                                                                                                  | 3 | 0.6 | 1.28  | 0.36  | -0.30 | 1.11  | 1.61  | 0.71  | 0.07  | 1.48  | 1.20  | 0.35  | -0.38 | 1.03  | 1.04  | 0.16  | -0.49 | 0.91  | 0.00 |
| Y9UHV     | Mediator of RNA polymerase II transcription subunit 13 OS=Homo sapiens SURP and G-patch                                                         | 1 | 0.6 | 0.66  | 0.36  | 0.79  | 1.16  | 0.49  | 0.21  | 0.70  | 1.04  | 0.26  | -0.12 | 0.25  | 0.70  | 0.85  | 0.39  | 0.94  | 1.45  | 0.00 |
| Y8IWZ:    | domain-containing protein 1 OS=Homo sapiens GN=SUGP1 PE=1 SV=2 -                                                                                | 1 | 0.6 | 0.79  | 0.63  | 0.83  | 0.79  | 1.09  | 0.95  | 1.17  | 1.14  | -0.17 | -0.26 | -0.12 | -0.17 | 0.84  | 0.72  | 0.94  | 0.88  | 0.00 |
|           |                                                                                                                                                 | 1 | 0.6 | -0.89 | 0.79  | -0.22 | -0.33 | 0.40  | 2.10  | 1.12  | 1.01  | 0.83  | 2.58  | 1.51  | 1.40  | -0.83 | 0.88  | -0.10 | -0.23 | 0.02 |

|        |                                                                                                               |    |     |       |       |       |       |       |       |       |       |       |       |       |      |       |       |       |       |      |
|--------|---------------------------------------------------------------------------------------------------------------|----|-----|-------|-------|-------|-------|-------|-------|-------|-------|-------|-------|-------|------|-------|-------|-------|-------|------|
| Q1501  | Homocysteine-responsive endoplasmic reticulum-resident ubiquitin-like domain member 1 protein OS=Homo sapiens | 1  | 0.6 | 0.60  | -0.79 | 0.74  | 0.45  | 0.57  | -0.80 | 0.75  | 0.46  | 0.99  | -0.34 | 1.13  | 0.83 | 1.67  | 0.31  | 1.86  | 1.56  | 0.01 |
| P01775 | Ig heavy chain V-III region TUR OS=Homo sapiens PE=1 SV=1                                                     | 1  | 0.6 | 1.21  | 0.43  | 0.74  | 1.22  | 0.82  | 0.04  | 0.47  | 0.86  | 0.19  | -0.45 | -0.20 | 0.31 | 1.48  | 0.54  | 0.87  | 1.38  | 0.00 |
| P01706 | Ig lambda chain V-II region BOH OS=Homo sapiens PE=1 SV=1                                                     | 1  | 0.6 | 0.02  | -0.06 | 0.57  | -0.11 | 0.84  | 0.34  | 0.73  | 0.25  | 1.79  | 1.08  | 1.65  | 0.96 | 0.68  | 0.21  | 0.65  | 0.14  | 0.00 |
| Q95393 | Bone morphogenetic protein 10 OS=Homo sapiens GN=BMP10                                                        | 1  | 0.6 | 0.40  | 0.42  | 0.14  | 0.20  | 0.54  | 0.58  | 0.32  | 0.39  | 0.56  | 0.65  | 0.31  | 0.37 | 1.27  | 1.32  | 1.06  | 1.11  | 0.00 |
| Q81Z26 | Zinc finger protein 34 OS=Homo sapiens GN=ZNF34 PE=1 SV=3                                                     | 1  | 0.6 | 1.10  | 0.30  | 0.46  | 0.71  | 1.11  | 0.32  | 0.50  | 0.75  | 1.02  | 0.29  | 0.38  | 0.63 | 0.94  | 0.17  | 0.35  | 0.58  | 0.00 |
| Y4G0U  | Cilia- and flagella-associated protein 221 OS=Homo sapiens GN=CFAP221 PE=1                                    | 2  | 0.6 | 1.54  | 0.07  | 1.28  | 1.09  | 1.02  | -0.42 | 0.80  | 0.62  | 0.78  | -0.62 | 0.52  | 0.33 | 1.13  | -0.30 | 0.92  | 0.72  | 0.00 |
| P25311 | Zinc-alpha-2-glycoprotein OS=Homo sapiens GN=AZGP1 PE=1 SV=2                                                  | 23 | 0.6 | 0.61  | 0.59  | 0.90  | 1.31  | 0.35  | 0.40  | 0.66  | 1.06  | 0.06  | 0.17  | 0.37  | 0.83 | 0.20  | 0.28  | 0.59  | 1.09  | 0.00 |
| Q62P01 | RNA-binding protein 44 OS=Homo sapiens GN=RBM44 PE=2 SV=2                                                     | 1  | 0.6 | -0.03 | 0.81  | 0.21  | 0.69  | 0.06  | 0.92  | 0.34  | 0.83  | -0.63 | 0.28  | -0.38 | 0.10 | 1.08  | 1.95  | 1.38  | 1.85  | 0.01 |
| P20700 | Lamin-B1 OS=Homo sapiens GN=LMBN1 PE=1 SV=2                                                                   | 1  | 0.6 | 1.80  | 1.74  | 1.89  | 2.07  | -0.18 | -0.22 | -0.05 | 0.13  | 0.03  | 0.04  | 0.13  | 0.30 | 0.33  | 0.30  | 0.48  | 0.64  | 0.01 |
| P21583 | Kit ligand OS=Homo sapiens GN=KITLG PE=1 SV=1                                                                 | 1  | 0.6 | -0.22 | 0.18  | -0.27 | -0.47 | 0.99  | 1.41  | 0.98  | 0.79  | 1.23  | 1.70  | 1.19  | 0.99 | 0.15  | 0.59  | 0.16  | -0.05 | 0.00 |
| P80362 | Ig kappa chain V-I region WAT OS=Homo sapiens PE=1 SV=1                                                       | 1  | 0.6 | 1.00  | 2.30  | -0.80 | 1.06  | 1.21  | 1.31  | -0.84 | 1.15  | 0.55  | 0.71  | -0.81 | 0.46 | 0.45  | 1.79  | -0.80 | 0.55  | 0.03 |
| P2791E | Properdin OS=Homo sapiens GN=CFP PE=1 SV=2                                                                    | 4  | 0.6 | -0.01 | 0.09  | 0.60  | 1.37  | 0.10  | 0.17  | 0.65  | 1.35  | -0.48 | -0.23 | 0.04  | 0.87 | 0.67  | 0.84  | 1.36  | 1.87  | 0.00 |
| Y9HCK  | DBF4-type zinc finger-containing protein 2 OS=Homo sapiens GN=ZDBF2 PE=1 SV=3                                 | 1  | 0.6 | 0.07  | 0.87  | -0.06 | 0.22  | 0.51  | 1.33  | 0.42  | 0.70  | 0.88  | 1.75  | 0.75  | 1.03 | -0.08 | 0.75  | -0.16 | 0.10  | 0.00 |
| Q9P2F1 | Storkhead-box protein 2 OS=Homo sapiens GN=STOX2 PE=2 SV=2                                                    | 1  | 0.6 | 0.51  | 1.69  | -0.11 | 0.63  | 0.73  | 2.48  | 0.01  | 1.01  | 0.25  | 1.59  | 0.01  | 0.49 | -0.11 | 0.53  | -0.81 | 0.17  | 0.01 |
| Y9UFH  | Dynein heavy chain 17, axonemal OS=Homo sapiens GN=DNAH17                                                     | 1  | 0.6 | 0.53  | 0.20  | 0.94  | 0.53  | 0.75  | 1.26  | 1.01  | 0.54  | 0.28  | 0.69  | 0.98  | 0.49 | 0.31  | -0.18 | 0.39  | 0.30  | 0.00 |
| P1806E | Insulin-like growth factor-binding protein 2 OS=Homo sapiens GN=IGFBP2 PE=1 SV=2                              | 7  | 0.6 | 0.12  | 0.47  | -0.34 | -0.31 | 1.51  | 2.24  | 1.21  | 1.34  | 1.00  | 1.46  | 0.50  | 0.44 | -0.40 | 0.42  | -0.43 | -0.32 | 0.02 |
| Y9H3U  | Protein unc-45 homolog A OS=Homo sapiens GN=UNC45A PE=1                                                       | 1  | 0.6 | 1.07  | 1.13  | 0.60  | 0.76  | 0.77  | 0.85  | 0.34  | 0.50  | 1.68  | 1.80  | 1.21  | 1.37 | -0.66 | -0.57 | -1.08 | -0.93 | 0.03 |
| Q00761 | Acetyl-CoA carboxylase 2 OS=Homo sapiens GN=ACACB PE=1 SV=3                                                   | 1  | 0.6 | 0.39  | 0.71  | -0.28 | -0.35 | 1.52  | 1.86  | 0.89  | 0.81  | 0.88  | 1.27  | 0.22  | 0.14 | 0.44  | 0.79  | -0.18 | -0.27 | 0.00 |
| Y9UNN  | Endothelial protein C receptor OS=Homo sapiens GN=PROCR                                                       | 3  | 0.6 | 0.40  | 0.10  | 0.79  | 0.89  | 0.29  | -0.06 | 0.60  | 0.69  | -0.29 | -0.58 | 0.37  | 0.19 | 1.16  | 0.94  | 1.69  | 1.60  | 0.00 |
| P35527 | Keratin, type I cytoskeletal 9 OS=Homo sapiens GN=KRT9 PE=1                                                   | 12 | 0.5 | 1.99  | 1.86  | 1.97  | 1.37  | 0.29  | 0.13  | 0.17  | -0.41 | 1.00  | 1.17  | 1.01  | 0.38 | -0.41 | -0.16 | -0.54 | -1.04 | 0.04 |
| P15927 | Replication protein A 32 kDa subunit OS=Homo sapiens GN=RPA2 PE=1 SV=1                                        | 1  | 0.5 | 0.56  | 1.29  | -0.18 | 1.50  | -0.05 | 0.69  | -0.76 | 0.93  | 0.49  | 1.29  | -0.24 | 1.44 | 0.18  | 0.94  | -0.51 | 1.16  | 0.01 |
| P01607 | Ig kappa chain V-I region Rei OS=Homo sapiens PE=1 SV=1                                                       | 2  | 0.5 | 0.22  | 0.60  | 0.40  | -0.17 | 1.18  | 1.56  | 1.42  | 1.05  | 0.69  | 1.02  | 0.92  | 0.54 | -0.39 | 0.07  | 0.06  | -0.41 | 0.00 |

|                                                                                                                                                                                                                                                                                   |    |     |       |       |       |       |       |       |       |       |       |       |       |       |       |       |       |       |      |
|-----------------------------------------------------------------------------------------------------------------------------------------------------------------------------------------------------------------------------------------------------------------------------------|----|-----|-------|-------|-------|-------|-------|-------|-------|-------|-------|-------|-------|-------|-------|-------|-------|-------|------|
| Peptidoglycan recognition                                                                                                                                                                                                                                                         |    |     |       |       |       |       |       |       |       |       |       |       |       |       |       |       |       |       |      |
| Q7559 protein 1 OS=Homo sapiens GN=PGLYRP1                                                                                                                                                                                                                                        | 1  | 0.5 | 0.44  | 1.39  | -0.01 | 1.02  | 0.32  | 1.02  | -0.09 | 0.62  | 0.02  | 0.94  | -0.47 | 0.62  | 0.46  | 1.49  | 0.07  | 0.88  | 0.00 |
| Vitamin D-binding protein                                                                                                                                                                                                                                                         |    |     |       |       |       |       |       |       |       |       |       |       |       |       |       |       |       |       |      |
| P02774 OS=Homo sapiens GN=GC PE=1 SV=1 - Ankyrin-2 OS=Homo sapiens GN=ANK2 PE=1 SV=4 - [ANK2_HUMAN]                                                                                                                                                                               | 37 | 0.5 | 0.40  | 0.79  | 0.98  | 1.10  | 0.13  | 0.51  | 0.64  | 0.82  | -0.26 | 0.30  | 0.30  | 0.48  | 0.15  | 0.52  | 0.74  | 0.88  | 0.00 |
| Q0148 A-kinase anchor protein 9 OS=Homo sapiens GN=AKAP9 PE=1 SV=3 - Methyl-CpG-binding protein 2 OS=Homo sapiens GN=MECP2                                                                                                                                                        | 1  | 0.5 | -0.61 | -0.47 | 0.50  | 0.31  | -0.58 | -0.42 | 0.57  | 0.38  | 0.51  | 0.72  | 1.63  | 1.43  | 0.54  | 0.72  | 1.71  | 1.50  | 0.02 |
| Q99991 Protein flightless-1 homolog OS=Homo sapiens GN=FLII PE=1 SV=1                                                                                                                                                                                                             | 3  | 0.5 | 0.50  | 0.22  | 0.08  | -0.36 | 2.49  | 1.77  | 1.66  | 1.34  | 0.58  | 0.36  | 0.21  | -0.20 | 0.18  | -0.07 | -0.23 | -0.11 | 0.02 |
| P5160E Ig kappa chain V-II region Cum OS=Homo sapiens PE=1 SV=1 - Protocadherin beta-2 OS=Homo sapiens GN=PCDHB2 PE=1 SV=1                                                                                                                                                        | 1  | 0.5 | 0.10  | 1.43  | 1.02  | -0.03 | -0.22 | 1.13  | 0.74  | -0.31 | -0.02 | 1.38  | 0.91  | -0.15 | 0.04  | 1.40  | 1.01  | -0.05 | 0.01 |
| Q1304 Protein flightless-1 homolog OS=Homo sapiens GN=FLII PE=1 SV=1                                                                                                                                                                                                              | 1  | 0.5 | 0.04  | 0.64  | 0.47  | 1.20  | -0.61 | 0.01  | -0.14 | 0.59  | 0.96  | 1.64  | 1.40  | 2.12  | -0.57 | 0.07  | -0.08 | 0.63  | 0.02 |
| P01614 Ig kappa chain V-II region Cum OS=Homo sapiens PE=1 SV=1 - Protocadherin beta-2 OS=Homo sapiens GN=PCDHB2 PE=1 SV=1                                                                                                                                                        | 2  | 0.5 | 0.26  | 0.50  | 0.35  | 0.71  | 1.18  | 1.43  | 1.14  | 1.87  | 0.20  | 0.50  | 0.24  | 0.72  | -0.50 | -0.22 | -0.40 | 0.20  | 0.01 |
| Q9Y5E Protein KIBRA OS=Homo sapiens GN=KIBRA PE=1 SV=1                                                                                                                                                                                                                            | 1  | 0.5 | -0.80 | 0.21  | -0.86 | 1.36  | 0.22  | 1.24  | 0.69  | 2.41  | -0.78 | 0.30  | 0.01  | 1.37  | -0.22 | 0.82  | 0.22  | 1.97  | 0.05 |
| Q8DX0 Spectrin alpha chain, non-erythrocytic 1 OS=Homo sapiens GN=WWC1 PE=1 SV=1 - Sperm-associated antigen 17 OS=Homo sapiens GN=SPAG17                                                                                                                                          | 1  | 0.5 | 0.14  | 0.59  | 0.31  | -0.55 | 0.77  | 1.24  | 0.98  | 0.13  | 0.96  | 1.48  | 1.14  | 0.28  | 0.14  | 0.63  | 0.37  | -0.50 | 0.00 |
| Q1381 Protein flightless-1 homolog OS=Homo sapiens GN=FLII PE=1 SV=1                                                                                                                                                                                                              | 3  | 0.5 | 0.48  | 0.65  | 1.88  | 1.92  | -0.28 | -0.48 | 0.42  | 0.59  | 0.08  | 0.32  | 0.65  | 0.68  | 0.29  | 0.43  | 0.19  | 0.27  | 0.01 |
| Q6Q75 Pro-cathepsin H OS=Homo sapiens GN=CTSH PE=1 SV=4 - Ig heavy chain V-III region KOL OS=Homo sapiens PE=1 SV=1 - DNA excision repair protein ERCC-6-like OS=Homo sapiens GN=ERCC6L PE=1 SV=1                                                                                 | 1  | 0.5 | 0.41  | 0.66  | 0.36  | 0.35  | 0.56  | 0.95  | 0.51  | 0.42  | 0.33  | 0.99  | 0.26  | 0.61  | 0.25  | 0.89  | 0.25  | 0.29  | 0.00 |
| P0966E Serpin E3 OS=Homo sapiens GN=SERPINE3 PE=2 SV=2 - UDP-glucuronosyltransferase 1-9 OS=Homo sapiens GN=UGT1A9 PE=1 SV=1 - Complement factor H-related protein 2 OS=Homo sapiens GN=CFHR2 PE=1 SV=1 - Serine/threonine-protein kinase N2 OS=Homo sapiens GN=PKN2 PE=1 SV=1    | 1  | 0.5 | 0.77  | 0.42  | 0.59  | 0.63  | 0.84  | 0.51  | 0.70  | 0.75  | 0.98  | 0.70  | 0.81  | 0.84  | 0.01  | -0.30 | -0.11 | -0.09 | 0.00 |
| P01772 Serpin E3 OS=Homo sapiens GN=SERPINE3 PE=2 SV=2 - UDP-glucuronosyltransferase 1-9 OS=Homo sapiens GN=UGT1A9 PE=1 SV=1 - Complement factor H-related protein 2 OS=Homo sapiens GN=CFHR2 PE=1 SV=1 - Serine/threonine-protein kinase N2 OS=Homo sapiens GN=PKN2 PE=1 SV=1    | 1  | 0.5 | 0.44  | 0.49  | 0.58  | 0.92  | 0.42  | 0.47  | 0.45  | 1.20  | 0.34  | 0.21  | 0.49  | 0.82  | 0.04  | 0.11  | 0.26  | 0.78  | 0.00 |
| Q2NKX Serpin E3 OS=Homo sapiens GN=SERPINE3 PE=2 SV=2 - UDP-glucuronosyltransferase 1-9 OS=Homo sapiens GN=UGT1A9 PE=1 SV=1 - Complement factor H-related protein 2 OS=Homo sapiens GN=CFHR2 PE=1 SV=1 - Serine/threonine-protein kinase N2 OS=Homo sapiens GN=PKN2 PE=1 SV=1     | 1  | 0.5 | 0.08  | 0.04  | -1.14 | -0.51 | 0.93  | 0.91  | -0.25 | 0.39  | 0.79  | 0.82  | -0.43 | 0.20  | 1.96  | 1.95  | 0.79  | 1.41  | 0.04 |
| .8MV2 Serpin E3 OS=Homo sapiens GN=SERPINE3 PE=2 SV=2 - UDP-glucuronosyltransferase 1-9 OS=Homo sapiens GN=UGT1A9 PE=1 SV=1 - Complement factor H-related protein 2 OS=Homo sapiens GN=CFHR2 PE=1 SV=1 - Serine/threonine-protein kinase N2 OS=Homo sapiens GN=PKN2 PE=1 SV=1     | 1  | 0.5 | 0.31  | 0.33  | 0.86  | 1.20  | 0.07  | 0.11  | 0.65  | 1.00  | -0.87 | -0.78 | -0.31 | 0.02  | 0.94  | 1.00  | 1.54  | 1.87  | 0.02 |
| Q6065I UDP-glucuronosyltransferase 1-9 OS=Homo sapiens GN=UGT1A9 PE=1 SV=1 - Complement factor H-related protein 2 OS=Homo sapiens GN=CFHR2 PE=1 SV=1 - Serine/threonine-protein kinase N2 OS=Homo sapiens GN=PKN2 PE=1 SV=1                                                      | 1  | 0.5 | 1.39  | 0.80  | 0.79  | 0.96  | 0.58  | 0.02  | 0.02  | 0.20  | 0.53  | 0.02  | -0.06 | 0.10  | 1.01  | 0.46  | 0.46  | 0.62  | 0.00 |
| P3698C Serpin E3 OS=Homo sapiens GN=SERPINE3 PE=2 SV=2 - UDP-glucuronosyltransferase 1-9 OS=Homo sapiens GN=UGT1A9 PE=1 SV=1 - Complement factor H-related protein 2 OS=Homo sapiens GN=CFHR2 PE=1 SV=1 - Serine/threonine-protein kinase N2 OS=Homo sapiens GN=PKN2 PE=1 SV=1    | 7  | 0.5 | 0.60  | 1.25  | -0.26 | 0.34  | 0.84  | 1.47  | 0.09  | 0.66  | 0.93  | 1.51  | 0.13  | 0.61  | 0.02  | 0.71  | -0.77 | -0.23 | 0.01 |
| Q1651I Serpin E3 OS=Homo sapiens GN=SERPINE3 PE=2 SV=2 - UDP-glucuronosyltransferase 1-9 OS=Homo sapiens GN=UGT1A9 PE=1 SV=1 - Complement factor H-related protein 2 OS=Homo sapiens GN=CFHR2 PE=1 SV=1 - Serine/threonine-protein kinase N2 OS=Homo sapiens GN=PKN2 PE=1 SV=1    | 1  | 0.5 | 0.86  | -0.33 | 0.85  | 0.12  | 0.72  | -0.46 | 0.74  | 0.02  | 0.89  | -0.23 | 0.88  | 0.15  | 1.36  | 0.21  | 1.41  | 0.67  | 0.00 |
| Q7501I Serpin E3 OS=Homo sapiens GN=SERPINE3 PE=2 SV=2 - UDP-glucuronosyltransferase 1-9 OS=Homo sapiens GN=UGT1A9 PE=1 SV=1 - Complement factor H-related protein 2 OS=Homo sapiens GN=CFHR2 PE=1 SV=1 - Serine/threonine-protein kinase N2 OS=Homo sapiens GN=PKN2 PE=1 SV=1    | 5  | 0.5 | -0.41 | 0.41  | 0.45  | 0.62  | -0.41 | 0.63  | 0.72  | 0.54  | -0.04 | 0.93  | 0.94  | 0.95  | -0.25 | 0.90  | 0.92  | 0.77  | 0.00 |
| Q1500 PCNA-associated factor OS=Homo sapiens GN=KIAA0101 PE=1 SV=1 - Sorting nexin-4 OS=Homo sapiens GN=SNX4 PE=1 SV=1 - Dynein heavy chain 1, axonemal OS=Homo sapiens GN=DNAH1                                                                                                  | 1  | 0.5 | 0.12  | -0.78 | -0.75 | 0.70  | 1.20  | 0.32  | 0.37  | 1.83  | 1.21  | 0.38  | 0.35  | 1.79  | 0.50  | -0.37 | -0.32 | 1.12  | 0.03 |
| Q9521I Serpin E3 OS=Homo sapiens GN=SERPINE3 PE=2 SV=2 - UDP-glucuronosyltransferase 1-9 OS=Homo sapiens GN=UGT1A9 PE=1 SV=1 - Complement factor H-related protein 2 OS=Homo sapiens GN=CFHR2 PE=1 SV=1 - Serine/threonine-protein kinase N2 OS=Homo sapiens GN=PKN2 PE=1 SV=1    | 1  | 0.5 | 0.67  | 0.81  | 1.16  | -0.69 | 0.31  | 0.46  | 0.84  | -1.00 | 0.64  | 0.84  | 1.13  | -0.72 | 0.95  | 1.12  | 1.49  | -0.37 | 0.02 |
| Q9P2D Exostosin-like 2 OS=Homo sapiens GN=EXTL2 PE=1 SV=1 - UDP-glucuronosyltransferase 1-9 OS=Homo sapiens GN=UGT1A9 PE=1 SV=1 - Complement factor H-related protein 2 OS=Homo sapiens GN=CFHR2 PE=1 SV=1 - Serine/threonine-protein kinase N2 OS=Homo sapiens GN=PKN2 PE=1 SV=1 | 1  | 0.5 | 0.09  | -0.80 | -0.26 | -0.46 | 0.74  | -0.12 | 0.43  | 0.24  | 0.58  | -0.23 | 0.24  | 0.04  | 2.19  | 1.34  | 1.90  | 1.68  | 0.05 |
| Q9UBQ Exostosin-like 2 OS=Homo sapiens GN=EXTL2 PE=1 SV=1 - UDP-glucuronosyltransferase 1-9 OS=Homo sapiens GN=UGT1A9 PE=1 SV=1 - Complement factor H-related protein 2 OS=Homo sapiens GN=CFHR2 PE=1 SV=1 - Serine/threonine-protein kinase N2 OS=Homo sapiens GN=PKN2 PE=1 SV=1 | 1  | 0.5 | 0.70  | -0.24 | 1.26  | 0.45  | 0.92  | 0.00  | 1.51  | 0.71  | 0.08  | -0.79 | 0.64  | -0.17 | 0.75  | -0.16 | 1.35  | 0.53  | 0.01 |

|        |                                                                                    |    |     |       |       |       |       |       |       |       |       |       |       |       |       |       |       |       |       |      |
|--------|------------------------------------------------------------------------------------|----|-----|-------|-------|-------|-------|-------|-------|-------|-------|-------|-------|-------|-------|-------|-------|-------|-------|------|
|        | Keratin, type II                                                                   |    |     |       |       |       |       |       |       |       |       |       |       |       |       |       |       |       |       |      |
| P04264 | cytoskeletal 1 OS=Homo sapiens GN=KRT1 PE=1                                        | 20 | 0.5 | 1.48  | 1.68  | 1.25  | 0.73  | 0.51  | 0.72  | 0.43  | -0.11 | 0.70  | 0.86  | 0.48  | 0.04  | -0.14 | -0.01 | -0.29 | -0.86 | 0.01 |
|        | Dedicator of cytokinesis                                                           |    |     |       |       |       |       |       |       |       |       |       |       |       |       |       |       |       |       |      |
| Q9H7D  | protein 5 OS=Homo sapiens GN=DOCK5                                                 | 1  | 0.5 | 0.19  | 0.43  | 0.41  | -0.40 | 0.92  | 1.18  | 1.18  | 0.37  | 0.77  | 1.08  | 0.99  | 0.18  | 0.05  | 0.32  | 0.32  | -0.50 | 0.00 |
|        | Ig kappa chain V-I region                                                          |    |     |       |       |       |       |       |       |       |       |       |       |       |       |       |       |       |       |      |
| P01606 | OU OS=Homo sapiens PE=1 SV=1 -                                                     | 2  | 0.5 | 0.34  | 0.65  | 0.44  | 0.54  | 0.57  | 0.89  | 0.70  | 0.81  | -0.06 | 0.89  | 0.61  | 0.70  | -0.09 | 0.25  | 0.07  | 0.15  | 0.00 |
|        | Phosphatidylcholine-sterol acyltransferase                                         |    |     |       |       |       |       |       |       |       |       |       |       |       |       |       |       |       |       |      |
| P04180 | OS=Homo sapiens GN=LCAT PE=1 SV=1 -                                                | 2  | 0.5 | 0.33  | -0.60 | 0.24  | -0.19 | -0.09 | -0.52 | -0.14 | -0.13 | 0.87  | -0.01 | 0.65  | 0.36  | 2.00  | 1.08  | 1.96  | 1.52  | 0.04 |
|        | Voltage-dependent L-type calcium channel subunit alpha-1S                          |    |     |       |       |       |       |       |       |       |       |       |       |       |       |       |       |       |       |      |
| Q13691 | OS=Homo sapiens                                                                    | 1  | 0.5 | -0.24 | 0.19  | -0.04 | -0.17 | 0.29  | 0.74  | 0.53  | 0.41  | 0.51  | 1.01  | 0.72  | 0.58  | 0.50  | 0.96  | 0.75  | 0.60  | 0.00 |
|        | Hemopexin OS=Homo sapiens GN=HPX PE=1 SV=2 - [HEMO_HUMAN]                          | 33 | 0.5 | 0.43  | 0.25  | 0.83  | 0.86  | 0.13  | -0.07 | 0.54  | 0.59  | -0.09 | -0.17 | 0.33  | 0.36  | 0.63  | 0.50  | 1.08  | 1.09  | 0.00 |
|        | Ig lambda chain V-V region DEL OS=Homo sapiens PE=1 SV=1 -                         | 2  | 0.5 | 0.25  | 1.34  | 0.80  | 0.94  | 0.03  | 1.07  | 0.23  | 0.46  | -0.44 | 1.18  | 0.30  | 0.42  | -0.33 | 0.82  | 0.10  | 0.03  | 0.00 |
|        | Protein GREB1                                                                      |    |     |       |       |       |       |       |       |       |       |       |       |       |       |       |       |       |       |      |
| Q4ZG51 | OS=Homo sapiens GN=GREB1 PE=2 SV=1 -                                               | 2  | 0.4 | 0.35  | 0.91  | 1.19  | 1.33  | -0.37 | 0.21  | 0.43  | 0.40  | 0.01  | 0.22  | 0.62  | 0.16  | -0.16 | 0.43  | 0.80  | 0.65  | 0.00 |
|        | Toll-like receptor 7                                                               |    |     |       |       |       |       |       |       |       |       |       |       |       |       |       |       |       |       |      |
| Q9NYK  | OS=Homo sapiens GN=TLR7 PE=1 SV=1 -                                                | 1  | 0.4 | 0.66  | 0.69  | -0.02 | -0.34 | 1.03  | 1.08  | 0.39  | 0.07  | 0.78  | 0.88  | 0.10  | -0.23 | 0.89  | 0.95  | 0.26  | -0.08 | 0.00 |
|        | Putative uncharacterized protein encoded by LINC00615 OS=Homo sapiens GN=LINC00615 | 1  | 0.4 | 0.75  | 1.12  | 0.41  | 0.52  | 0.33  | 0.72  | 0.03  | 0.15  | 0.35  | 0.79  | 0.01  | 0.12  | 0.47  | 0.87  | 0.18  | 0.28  | 0.00 |
|        | Cystatin-C OS=Homo sapiens GN=CST3 PE=1 SV=1 - [CYTC_HUMAN]                        | 4  | 0.4 | 0.64  | 0.59  | 0.41  | 0.09  | 0.84  | 0.77  | 0.61  | 0.28  | 0.82  | 0.85  | 0.52  | 0.33  | 0.24  | 0.27  | 0.17  | -0.32 | 0.00 |
|        | HLA class II histocompatibility antigen, DR alpha chain OS=Homo sapiens            | 1  | 0.4 | 0.37  | 1.10  | 1.35  | 0.58  | 0.30  | 1.05  | 1.32  | 0.55  | 0.05  | 0.85  | 1.04  | 0.26  | -0.96 | -0.19 | 0.08  | -0.71 | 0.02 |
|        | Fructose-bisphosphate aldolase A OS=Homo sapiens GN=ALDOA                          | 1  | 0.4 | 0.32  | 1.07  | 1.00  | -0.11 | 0.09  | 0.87  | 0.82  | -0.29 | 0.19  | 1.01  | 0.88  | -0.24 | 0.03  | 0.82  | 0.77  | -0.36 | 0.00 |
|        | EH domain-binding protein 1 OS=Homo sapiens GN=EHP1                                | 1  | 0.4 | 0.61  | 1.17  | 0.04  | 0.58  | 1.09  | 1.67  | 0.56  | 1.10  | -0.03 | 0.60  | -0.59 | -0.06 | 0.00  | 0.59  | -0.52 | 0.00  | 0.02 |
|        | Amyloid beta A4 protein OS=Homo sapiens GN=APP PE=1 SV=3 -                         | 3  | 0.4 | -0.17 | -0.57 | -0.12 | -0.27 | 1.26  | 1.29  | 1.15  | 0.62  | 0.22  | -0.08 | 0.03  | 0.10  | 0.99  | 0.77  | 1.11  | 0.48  | 0.01 |
|        | Zinc finger FYVE domain-containing protein 26 OS=Homo sapiens GN=ZFYVE26 PE=1      | 1  | 0.4 | 1.21  | 0.71  | 1.78  | 1.89  | 0.03  | -0.45 | 0.64  | 0.76  | -0.03 | -0.45 | 0.55  | 0.66  | -0.35 | -0.81 | 0.27  | 0.37  | 0.04 |
|        | Oxysterol-binding protein-related protein 3 OS=Homo sapiens GN=OSBPL3 PE=1 SV=1    | 1  | 0.4 | 0.49  | 1.28  | 0.76  | 0.02  | -0.01 | 0.80  | 0.30  | -0.44 | 0.44  | 1.29  | 0.71  | -0.04 | 0.11  | 0.93  | 0.43  | -0.32 | 0.01 |
|        | Zinc finger Y-chromosomal protein OS=Homo sapiens                                  | 1  | 0.4 | 0.83  | 0.36  | 0.09  | 0.17  | 1.64  | 1.18  | 0.93  | 1.02  | 0.67  | 0.27  | -0.07 | 0.01  | 0.35  | -0.09 | -0.34 | -0.28 | 0.01 |
|        | Plasminogen activator inhibitor 1 OS=Homo sapiens GN=SERPINE1                      | 4  | 0.4 | -0.72 | -0.23 | 0.13  | -0.06 | 0.09  | 0.21  | 0.12  | 0.34  | 0.94  | 1.12  | 0.95  | 1.15  | -0.02 | 0.36  | 1.08  | 1.24  | 0.01 |
|        | Attractin OS=Homo sapiens GN=ATRN PE=1 SV=2 - [ATRN_HUMAN]                         | 1  | 0.4 | -0.19 | 0.21  | -0.87 | -0.31 | 1.39  | 1.81  | 0.76  | 1.32  | 0.64  | 1.11  | -0.03 | 0.52  | 0.14  | 0.58  | -0.48 | 0.07  | 0.04 |
|        | Neutrophil elastase OS=Homo sapiens GN=ELANE PE=1 SV=1 -                           | 2  | 0.4 | 0.70  | 0.17  | -0.05 | 1.22  | 0.11  | -0.17 | -0.45 | 0.67  | 0.19  | -0.02 | -0.38 | 0.66  | 1.07  | 0.76  | 0.54  | 1.63  | 0.01 |
|        | Haptoglobin OS=Homo sapiens GN=HP PE=1 SV=1 - [HPT_HUMAN]                          | 19 | 0.4 | 0.42  | 0.75  | 0.99  | 0.83  | -0.85 | -0.50 | -0.14 | -0.26 | -0.34 | 0.04  | 0.30  | 0.22  | 0.94  | 1.25  | 1.50  | 1.44  | 0.04 |

| Low affinity |                                                                                                                                                                                                                                                                                                     |    |     |       |       |       |       |       |       |       |       |       |       |       |       |       |       |       |       |      |
|--------------|-----------------------------------------------------------------------------------------------------------------------------------------------------------------------------------------------------------------------------------------------------------------------------------------------------|----|-----|-------|-------|-------|-------|-------|-------|-------|-------|-------|-------|-------|-------|-------|-------|-------|-------|------|
| P08637       | immunoglobulin gamma Fc region receptor III-A OS=Homo sapiens Prohibitin OS=Homo                                                                                                                                                                                                                    | 3  | 0.4 | 0.68  | 1.03  | 0.40  | 1.08  | 0.12  | 0.51  | -0.07 | 0.62  | 0.47  | 0.92  | 0.26  | 0.93  | -0.20 | 0.23  | -0.49 | 0.11  | 0.00 |
| P35232       | sapiens GN=PHB PE=1 SV=1 - [PHB_HUMAN]                                                                                                                                                                                                                                                              | 1  | 0.4 | 0.51  | 0.83  | 0.13  | 0.67  | 0.62  | 0.95  | 0.28  | 0.82  | 0.39  | 0.78  | 0.02  | 0.55  | -0.06 | 0.29  | -0.38 | 0.14  | 0.00 |
| P01137       | Transforming growth factor beta-1 OS=Homo sapiens GN=TGFBI Aftiplin OS=Homo                                                                                                                                                                                                                         | 2  | 0.4 | -0.13 | 0.45  | -0.34 | -0.33 | 0.47  | 1.07  | 0.30  | 0.15  | 0.53  | 1.17  | 0.32  | 0.59  | 0.50  | 1.11  | 0.34  | 0.31  | 0.00 |
| Q6ULP1       | sapiens GN=AFTPH PE=1 SV=2 - Myeloperoxidase OS=Homo sapiens GN=MPO PE=1 SV=1 - Tubby-related protein 1 OS=Homo sapiens                                                                                                                                                                             | 1  | 0.4 | -0.49 | 0.67  | 0.81  | 0.39  | -1.15 | 0.03  | 0.19  | -0.23 | -0.30 | 0.93  | 1.01  | 0.58  | 0.15  | 1.34  | 1.50  | 1.06  | 0.04 |
| P05164       | OS=Homo sapiens GN=MPO PE=1 SV=1 - Tubby-related protein 1 OS=Homo sapiens                                                                                                                                                                                                                          | 3  | 0.4 | 0.56  | -0.03 | 0.75  | -0.45 | 0.21  | 0.41  | 0.79  | 0.12  | 0.43  | 0.26  | 0.56  | -0.13 | 1.05  | 0.18  | 1.87  | -0.13 | 0.01 |
| Q00294       | OS=Homo sapiens GN=TULP1 PE=1 SV=3 - Beta-2-glycoprotein 1 OS=Homo sapiens                                                                                                                                                                                                                          | 1  | 0.4 | 1.41  | 0.70  | -0.02 | 0.18  | 0.91  | 0.22  | -0.48 | -0.28 | 1.14  | 0.49  | -0.29 | -0.10 | 1.41  | 0.73  | 0.03  | 0.22  | 0.02 |
| P02746       | OS=Homo sapiens GN=APOH PE=1 SV=3 - IQ domain-containing protein H OS=Homo sapiens GN=IQCH PE=2                                                                                                                                                                                                     | 23 | 0.4 | 0.27  | 0.82  | 0.59  | 0.03  | 0.71  | 1.22  | 1.04  | 0.48  | 0.73  | 1.27  | 1.03  | 0.51  | -0.75 | -0.28 | -0.44 | -0.99 | 0.04 |
| Q86VS1       | Ras association domain-containing protein 9 OS=Homo sapiens GN=RASSF9 PE=2 SV=2                                                                                                                                                                                                                     | 1  | 0.4 | 0.68  | 0.07  | 1.51  | 0.75  | 0.09  | -0.50 | 0.96  | 0.21  | 0.00  | -0.53 | 0.84  | 0.08  | 0.41  | -0.17 | 1.29  | 0.52  | 0.02 |
| Q75901       | OS=Homo sapiens GN=RASSF9 PE=2 SV=2 Kinesin-like protein KIF19 OS=Homo sapiens GN=KIF19 PE=2 SV=2 - Ig lambda chain V-II region WIN OS=Homo sapiens PE=1 SV=1 - Ig kappa chain V-III region WOL OS=Homo sapiens PE=1 SV=1 - Ig heavy chain V-III region GAL OS=Homo sapiens PE=1 SV=1 - Histone H2A | 1  | 0.4 | 0.00  | 0.77  | 0.18  | -0.04 | 0.88  | 1.67  | 1.10  | 0.88  | -0.31 | 0.53  | -0.13 | -0.35 | -0.01 | 0.79  | 0.22  | -0.02 | 0.02 |
| Q2TAC1       | OS=Homo sapiens GN=KIF19 PE=2 SV=2 - Ig lambda chain V-II region WIN OS=Homo sapiens PE=1 SV=1 - Ig kappa chain V-III region WOL OS=Homo sapiens PE=1 SV=1 - Ig heavy chain V-III region GAL OS=Homo sapiens PE=1 SV=1 - Histone H2A                                                                | 2  | 0.4 | 0.28  | -0.34 | 0.23  | 0.82  | 0.58  | -0.02 | 0.57  | 1.17  | 0.49  | -0.06 | 0.45  | 1.04  | 0.24  | -0.35 | 0.24  | 0.82  | 0.00 |
| P01712       | OS=Homo sapiens GN=KIF19 PE=2 SV=2 - Ig lambda chain V-II region WIN OS=Homo sapiens PE=1 SV=1 - Ig kappa chain V-III region WOL OS=Homo sapiens PE=1 SV=1 - Ig heavy chain V-III region GAL OS=Homo sapiens PE=1 SV=1 - Histone H2A                                                                | 2  | 0.4 | 0.62  | 0.68  | -0.08 | 0.39  | 0.78  | 1.12  | 0.42  | 0.54  | 0.63  | 0.78  | 0.05  | 0.39  | 0.07  | 0.35  | -0.55 | -0.05 | 0.00 |
| P01622       | OS=Homo sapiens GN=KIF19 PE=2 SV=2 - Ig lambda chain V-II region WIN OS=Homo sapiens PE=1 SV=1 - Ig kappa chain V-III region WOL OS=Homo sapiens PE=1 SV=1 - Ig heavy chain V-III region GAL OS=Homo sapiens PE=1 SV=1 - Histone H2A                                                                | 3  | 0.4 | 0.48  | 0.82  | 0.42  | 0.49  | 0.33  | 0.86  | 0.48  | 0.58  | 0.06  | 0.83  | 0.18  | 0.29  | 0.00  | 0.42  | -0.23 | 0.05  | 0.00 |
| P01781       | OS=Homo sapiens GN=KIF19 PE=2 SV=2 - Ig lambda chain V-II region WIN OS=Homo sapiens PE=1 SV=1 - Ig kappa chain V-III region WOL OS=Homo sapiens PE=1 SV=1 - Ig heavy chain V-III region GAL OS=Homo sapiens PE=1 SV=1 - Histone H2A                                                                | 5  | 0.4 | 0.77  | 0.20  | 0.32  | 0.33  | 1.04  | 0.56  | 0.67  | 0.64  | 0.58  | 0.07  | 0.24  | 0.18  | 0.32  | -0.08 | 0.09  | 0.08  | 0.00 |
| Q5VVJ1       | deubiquitinase MYSM1 OS=Homo sapiens GN=MYSM1 PE=1 SV=1 - Latent-transforming growth factor beta-binding protein 1 OS=Homo sapiens Microtubule-associated protein 6 OS=Homo sapiens GN=MAP6 PE=1                                                                                                    | 1  | 0.4 | 0.17  | 0.40  | 0.52  | -0.07 | 1.19  | 1.44  | 1.57  | 0.99  | -0.35 | -0.02 | 0.12  | -0.77 | 0.08  | 0.34  | 0.48  | -0.12 | 0.03 |
| Q14761       | OS=Homo sapiens GN=MYSM1 PE=1 SV=1 - Latent-transforming growth factor beta-binding protein 1 OS=Homo sapiens Microtubule-associated protein 6 OS=Homo sapiens GN=MAP6 PE=1                                                                                                                         | 5  | 0.4 | 0.34  | 0.54  | 0.24  | -0.03 | 0.42  | 0.82  | 0.19  | -0.15 | 0.23  | 0.61  | 0.15  | -0.03 | 0.70  | 0.89  | 0.64  | 0.41  | 0.00 |
| Q96JES       | OS=Homo sapiens GN=MAP6 PE=1 Histone-lysine N-methyltransferase, H3                                                                                                                                                                                                                                 | 1  | 0.4 | -0.48 | 0.14  | 0.62  | -0.04 | -0.25 | 0.39  | 0.89  | 0.23  | -0.02 | 0.67  | 1.09  | 0.42  | 0.01  | 0.66  | 1.16  | 0.49  | 0.01 |
| Q96L71       | lysine-36 and H4 lysine-20 specific OS=Homo sapiens GN=NSD1 PE=1                                                                                                                                                                                                                                    | 4  | 0.4 | 1.05  | 0.72  | -0.70 | -0.18 | 0.94  | 1.01  | -0.37 | 0.24  | 0.78  | 1.40  | -0.05 | 0.38  | 1.24  | 0.48  | -0.72 | -0.28 | 0.05 |
| P19957       | Elafin OS=Homo sapiens GN=PI3 PE=1 SV=3 - Platelet factor 4 OS=Homo sapiens GN=PF4 PE=1 SV=2 - Spectrin alpha chain, erythrocytic 1 OS=Homo sapiens GN=SPTA1                                                                                                                                        | 1  | 0.4 | 0.11  | -0.07 | 0.41  | -0.02 | 0.84  | 0.68  | 1.17  | 0.75  | 0.31  | 0.20  | 0.61  | 0.18  | 0.16  | 0.01  | 0.51  | 0.06  | 0.00 |
| P02776       | OS=Homo sapiens GN=PF4 PE=1 SV=2 - Spectrin alpha chain, erythrocytic 1 OS=Homo sapiens GN=SPTA1                                                                                                                                                                                                    | 3  | 0.4 | 0.39  | 1.47  | -0.16 | 0.16  | 0.55  | 1.17  | -0.20 | -0.09 | 0.99  | 1.70  | 0.25  | 0.29  | -0.18 | 0.62  | -0.63 | -0.45 | 0.05 |
| P02546       | OS=Homo sapiens GN=SPTA1 Zyxin OS=Homo sapiens GN=ZYX PE=1 SV=1 - Acyl-CoA synthetase family member 4 OS=Homo sapiens GN=AASDH PE=1 SV=3 -                                                                                                                                                          | 1  | 0.4 | 0.71  | -0.14 | -0.41 | 0.33  | 0.77  | 0.36  | 0.11  | 0.85  | 0.86  | 0.46  | 0.13  | 0.86  | 0.94  | -0.46 | 0.04  | 0.42  | 0.01 |
| Q15941       | OS=Homo sapiens GN=ZYX PE=1 SV=1 - Acyl-CoA synthetase family member 4 OS=Homo sapiens GN=AASDH PE=1 SV=3 -                                                                                                                                                                                         | 1  | 0.4 | 0.16  | 0.47  | -0.15 | -0.25 | 1.09  | 1.42  | 0.83  | 0.73  | 0.62  | 1.00  | 0.32  | 0.22  | -0.11 | 0.23  | -0.36 | -0.47 | 0.02 |
| Q4L231       | OS=Homo sapiens GN=AASDH PE=1 SV=3 -                                                                                                                                                                                                                                                                | 1  | 0.4 | 0.72  | 0.27  | 1.08  | -0.06 | 0.33  | -0.09 | 0.73  | -0.41 | 0.50  | 0.12  | 0.86  | -0.29 | 0.68  | 0.26  | 1.08  | -0.07 | 0.01 |



|       |                                                                                                                                                            |    |     |       |       |       |       |       |       |       |       |       |       |       |       |       |       |       |       |      |
|-------|------------------------------------------------------------------------------------------------------------------------------------------------------------|----|-----|-------|-------|-------|-------|-------|-------|-------|-------|-------|-------|-------|-------|-------|-------|-------|-------|------|
| 01605 | Ig kappa chain V-I region<br>Scw OS=Homo sapiens<br>PE=1 SV=1 -<br>Down syndrome cell<br>adhesion molecule-like<br>protein 1 OS=Homo<br>sapiens GN=DSCAML1 | 3  | 0.4 | 0.56  | 1.17  | 0.14  | 0.63  | 0.46  | 0.42  | 0.11  | 0.67  | 0.07  | 0.40  | -0.40 | 0.35  | 0.21  | 0.35  | 0.01  | 0.58  | 0.00 |
| 08TD8 | Ig kappa chain V-I region<br>DEE OS=Homo sapiens<br>PE=1 SV=1 -<br>Centriolin OS=Homo<br>sapiens GN=CNTRL                                                  | 1  | 0.4 | -0.36 | 0.23  | -0.17 | -0.41 | 0.42  | 1.02  | 0.64  | 0.41  | 0.44  | 1.10  | 0.63  | 0.38  | 0.12  | 0.74  | 0.36  | 0.11  | 0.01 |
| 01597 | Ig kappa chain V-I region<br>DEE OS=Homo sapiens<br>PE=1 SV=1 -<br>Centriolin OS=Homo<br>sapiens GN=CNTRL                                                  | 3  | 0.4 | 0.48  | 0.41  | 0.63  | 0.90  | 0.08  | 0.26  | 0.28  | 0.54  | 0.14  | -0.27 | 0.05  | 0.15  | 0.37  | 0.48  | 0.34  | 0.77  | 0.00 |
| 07Z7A | Uncharacterized protein<br>Cathepsin D OS=Homo<br>sapiens GN=CTSD PE=1<br>SV=1 - [CATD_HUMAN]                                                              | 2  | 0.3 | 0.13  | 0.71  | 0.39  | 0.73  | 0.08  | 0.61  | 0.38  | 0.45  | 0.03  | 0.62  | 0.36  | 0.30  | -0.13 | 0.36  | 0.21  | 0.36  | 0.00 |
| 07335 | Ig lambda-3 chain C<br>regions OS=Homo<br>sapiens GN=IGLC3 PE=1                                                                                            | 2  | 0.3 | 0.22  | 0.40  | 1.13  | 0.67  | -0.41 | 0.38  | 0.98  | 0.91  | -1.08 | -0.18 | 0.00  | 0.22  | -0.37 | 0.48  | 1.27  | 0.94  | 0.05 |
| 0CG0I | Uncharacterized protein<br>C2orf42 OS=Homo<br>sapiens GN=C2orf42                                                                                           | 2  | 0.3 | -0.11 | -0.07 | 1.06  | -0.12 | -0.07 | 0.42  | 1.16  | 0.30  | -0.03 | 0.25  | 1.25  | 0.01  | -0.05 | 0.16  | 0.88  | 0.47  | 0.01 |
| 9NWM  | Platelet basic protein<br>OS=Homo sapiens<br>GN=PPBP PE=1 SV=3 -<br>Microtubule-associated<br>protein 4 OS=Homo<br>sapiens GN=MAP4 PE=1                    | 1  | 0.3 | 0.59  | 0.77  | 0.20  | 0.44  | 0.91  | 1.11  | 0.56  | 0.81  | 0.48  | 0.74  | 0.11  | 0.34  | -0.33 | -0.12 | -0.66 | -0.43 | 0.02 |
| 02775 | Ig kappa chain V-III<br>region SIE OS=Homo<br>sapiens PE=1 SV=1 -<br>Cysteine-rich secretory<br>protein 3 OS=Homo<br>sapiens GN=CRISP3                     | 8  | 0.3 | 0.28  | 1.01  | 0.07  | 0.02  | 0.19  | 0.86  | 0.06  | 0.03  | 0.47  | 1.20  | 0.23  | 0.27  | 0.10  | 0.88  | -0.12 | -0.08 | 0.01 |
| 02781 | PDZ and LIM domain<br>protein 1 OS=Homo<br>sapiens GN=PDLIM1                                                                                               | 1  | 0.3 | 0.93  | 0.41  | 1.00  | 1.09  | -0.19 | -0.69 | -0.08 | 0.01  | 0.48  | 0.03  | 0.56  | 0.64  | 0.36  | -0.13 | 0.48  | 0.56  | 0.01 |
| 0162C | Putative nucleoside<br>diphosphate kinase<br>OS=Homo sapiens<br>GN=NME2P1 PE=5 SV=1                                                                        | 1  | 0.3 | 0.31  | 0.41  | 0.06  | 0.77  | 0.27  | 0.59  | 0.01  | 0.77  | 0.21  | 0.43  | 0.04  | 0.64  | 0.03  | 0.47  | -0.21 | 0.65  | 0.00 |
| 05410 | Secreted phosphoprotein<br>24 OS=Homo sapiens<br>GN=SPP2 PE=1 SV=1 -<br>Serotransferrin                                                                    | 6  | 0.3 | 0.14  | 0.79  | -0.28 | -0.33 | 0.67  | 1.28  | 0.54  | 0.43  | 0.55  | 1.22  | 0.45  | 0.28  | -0.16 | 0.48  | -0.22 | -0.42 | 0.02 |
| 00015 | E3 ubiquitin-protein ligase<br>FANCL OS=Homo<br>sapiens GN=FANCL                                                                                           | 3  | 0.3 | 0.92  | 1.04  | -0.17 | 0.78  | 0.30  | 0.69  | -0.58 | 0.42  | 0.86  | 1.18  | -0.02 | 0.72  | -0.16 | 0.45  | -0.98 | -0.17 | 0.05 |
| 06036 | Myeloblastin OS=Homo<br>sapiens GN=PRTN3<br>PE=1 SV=3 -<br>Alpha-N-<br>acetylgalactosaminide<br>alpha-2,6-<br>sialyltransferase 1<br>OS=Homo sapiens       | 1  | 0.3 | 0.40  | 0.30  | -0.05 | -0.21 | 0.88  | 0.79  | 0.46  | 0.31  | 0.73  | 0.70  | 0.29  | 0.12  | 0.40  | 0.33  | 0.00  | -0.18 | 0.00 |
| 01310 | Ig kappa chain V-III<br>region POM OS=Homo<br>sapiens PE=1 SV=1 -<br>Importin subunit alpha-5<br>OS=Homo sapiens<br>GN=KPNA1 PE=1 SV=3 -                   | 3  | 0.3 | 0.55  | 0.00  | -0.19 | -0.04 | 0.92  | 0.46  | 0.09  | 0.29  | 0.72  | 0.27  | 0.19  | 0.15  | 0.72  | 0.33  | 0.47  | 0.30  | 0.00 |
| 02787 | Ig kappa chain V-III<br>region POM OS=Homo<br>sapiens PE=1 SV=1 -<br>Importin subunit alpha-5<br>OS=Homo sapiens<br>GN=KPNA1 PE=1 SV=3 -                   | 55 | 0.3 | 0.33  | 0.42  | 0.24  | 0.04  | 0.59  | 0.67  | 0.49  | 0.33  | 0.43  | 0.64  | 0.35  | 0.18  | 0.17  | 0.26  | 0.12  | -0.07 | 0.00 |
| 09NW3 | Myeloblastin OS=Homo<br>sapiens GN=PRTN3<br>PE=1 SV=3 -<br>Alpha-N-<br>acetylgalactosaminide<br>alpha-2,6-<br>sialyltransferase 1<br>OS=Homo sapiens       | 1  | 0.3 | 0.25  | 0.42  | 0.15  | 0.51  | 0.18  | 0.37  | 0.24  | 0.61  | 0.23  | 0.77  | 0.31  | 0.67  | 0.05  | 0.25  | -0.11 | 0.24  | 0.00 |
| 02415 | Myeloblastin OS=Homo<br>sapiens GN=PRTN3<br>PE=1 SV=3 -<br>Alpha-N-<br>acetylgalactosaminide<br>alpha-2,6-<br>sialyltransferase 1<br>OS=Homo sapiens       | 2  | 0.3 | 0.50  | 0.64  | -0.31 | 0.21  | 0.57  | 0.44  | 0.30  | 0.34  | -0.04 | 0.03  | 0.23  | 0.01  | 0.64  | 0.87  | 0.18  | 0.44  | 0.00 |
| 09NSC | Ig kappa chain V-III<br>region POM OS=Homo<br>sapiens PE=1 SV=1 -<br>Importin subunit alpha-5<br>OS=Homo sapiens<br>GN=KPNA1 PE=1 SV=3 -                   | 1  | 0.3 | 0.38  | -0.06 | 0.23  | -0.17 | 0.69  | 0.27  | 0.57  | 0.18  | 0.03  | -0.34 | -0.12 | -0.52 | 1.22  | 0.81  | 1.12  | 0.71  | 0.03 |
| 01624 | Ig kappa chain V-I region<br>EU OS=Homo sapiens<br>PE=1 SV=1 -<br>Di-N-acetylchitinase<br>OS=Homo sapiens<br>GN=CTBS PE=1 SV=1 -                           | 2  | 0.3 | 0.29  | 0.84  | 0.72  | 0.73  | -0.14 | 0.44  | 0.11  | 0.21  | 0.10  | 0.80  | 0.35  | 0.28  | -0.42 | 0.29  | 0.02  | 0.34  | 0.00 |
| 05229 | Ig kappa chain V-I region<br>EU OS=Homo sapiens<br>PE=1 SV=1 -<br>Di-N-acetylchitinase<br>OS=Homo sapiens<br>GN=CTBS PE=1 SV=1 -                           | 1  | 0.3 | 0.57  | 0.74  | 0.35  | -0.16 | 0.54  | 0.72  | 0.35  | -0.16 | 0.48  | 0.71  | 0.27  | -0.25 | 0.36  | 0.55  | 0.19  | -0.34 | 0.00 |
| 01595 | Ig kappa chain V-I region<br>EU OS=Homo sapiens<br>PE=1 SV=1 -<br>Di-N-acetylchitinase<br>OS=Homo sapiens<br>GN=CTBS PE=1 SV=1 -                           | 3  | 0.3 | 0.05  | 0.25  | 0.17  | 0.49  | -0.10 | 0.03  | 0.14  | 0.37  | 0.75  | 1.21  | 0.80  | 1.26  | -0.32 | -0.20 | -0.15 | 0.12  | 0.02 |
| 01451 | Ig kappa chain V-I region<br>EU OS=Homo sapiens<br>PE=1 SV=1 -<br>Di-N-acetylchitinase<br>OS=Homo sapiens<br>GN=CTBS PE=1 SV=1 -                           | 2  | 0.3 | -0.07 | 0.02  | 0.86  | 0.72  | -0.43 | -0.33 | 0.53  | 0.40  | 0.22  | 0.37  | 1.15  | 1.01  | -0.38 | -0.27 | 0.60  | 0.45  | 0.03 |

|        |                                                                                              |    |     |       |       |       |       |       |       |       |       |       |       |       |       |       |       |       |       |      |
|--------|----------------------------------------------------------------------------------------------|----|-----|-------|-------|-------|-------|-------|-------|-------|-------|-------|-------|-------|-------|-------|-------|-------|-------|------|
| P0735E | Platelet glycoprotein Ib<br>alpha chain OS=Homo<br>sapiens GN=GP1BA<br>PE=1 SV=2 -           | 2  | 0.3 | -0.41 | 0.49  | 0.01  | 0.27  | 0.20  | 1.12  | 0.66  | 0.93  | -0.83 | 0.15  | -0.40 | -0.14 | 0.17  | 1.10  | 0.63  | 0.89  | 0.05 |
| O7514  | ICOS ligand OS=Homo<br>sapiens GN=ICOSLG<br>PE=1 SV=2 -                                      | 3  | 0.3 | 0.35  | 0.13  | 0.53  | 0.79  | 0.45  | 0.36  | 0.46  | 0.93  | 0.17  | 0.02  | 0.47  | 0.72  | -0.39 | -0.38 | -0.20 | 0.34  | 0.01 |
| P0395C | Angiogenin OS=Homo<br>sapiens GN=ANG PE=1<br>SV=1 - [ANGL_HUMAN]                             | 3  | 0.3 | 0.44  | 0.27  | 0.31  | 1.62  | -0.11 | 0.09  | -0.58 | 0.18  | 0.23  | 0.57  | -0.27 | 0.42  | 0.31  | 0.66  | -0.05 | 0.59  | 0.03 |
| P01857 | Ig gamma-1 chain C<br>region OS=Homo sapiens<br>GN=IGHG1 PE=1 SV=1 -<br>Filamin-A OS=Homo    | 8  | 0.3 | 0.19  | 0.79  | 0.20  | 0.15  | 0.23  | 1.01  | 0.26  | 0.29  | 0.21  | 0.90  | 0.18  | 0.25  | -0.15 | 0.44  | -0.19 | -0.14 | 0.00 |
| P2133E | sapiens GN=FLNA PE=1<br>SV=4 - [FLNA_HUMAN]<br>Desmocollin-1 OS=Homo                         | 1  | 0.3 | 0.43  | 0.50  | 0.27  | 0.57  | 0.03  | 0.12  | -0.09 | 0.22  | -0.33 | -0.19 | -0.48 | -0.18 | 0.88  | 0.98  | 0.77  | 1.06  | 0.03 |
| Q0855F | sapiens GN=DSC1 PE=1<br>SV=2 - [DSC1_HUMAN]<br>Serum albumin                                 | 3  | 0.3 | 0.07  | 0.23  | 0.23  | 0.01  | 0.37  | 0.49  | 0.48  | 0.27  | 0.51  | 0.72  | 0.67  | 0.44  | 0.08  | -0.03 | 0.07  | -0.06 | 0.00 |
| P0276E | OS=Homo sapiens<br>GN=ALB PE=1 SV=2 -<br>Tigger transposable<br>element-derived protein 6    | 74 | 0.3 | 0.27  | 0.40  | 0.49  | 0.31  | 0.14  | 0.30  | 0.39  | 0.22  | 0.05  | 0.25  | 0.25  | 0.13  | 0.18  | 0.37  | 0.45  | 0.29  | 0.00 |
| J17RP  | OS=Homo sapiens<br>GN=FIGD6 PE=2 SV=2 -<br>Poly(A) polymerase                                | 1  | 0.3 | 0.99  | 0.01  | 0.53  | 0.74  | 0.67  | -0.29 | 0.26  | 0.47  | 0.46  | -0.45 | 0.01  | 0.21  | 0.61  | -0.34 | 0.21  | 0.40  | 0.02 |
| J9BWT  | gamma OS=Homo<br>sapiens GN=PAPOLG<br>Ig lambda chain V-I                                    | 1  | 0.3 | 0.79  | 0.84  | 0.60  | 0.50  | -0.28 | -0.20 | -0.43 | -0.52 | 0.19  | 0.32  | 0.01  | -0.09 | 0.76  | 0.85  | 0.62  | 0.51  | 0.03 |
| P0170E | region NEWM OS=Homo<br>sapiens PE=1 SV=1 -<br>Protein SMG9 OS=Homo                           | 3  | 0.3 | 0.79  | 0.88  | 0.46  | -0.35 | 0.67  | 0.35  | 0.06  | -0.44 | 0.39  | 0.58  | 0.02  | -0.31 | 0.76  | 0.55  | 0.19  | -0.14 | 0.02 |
| J9H0W  | sapiens GN=SMG9 PE=1<br>SV=1 - [SMG9_HUMAN]<br>Leucine-rich repeat-<br>containing protein 53 | 1  | 0.3 | 0.53  | 0.59  | 0.52  | 0.28  | 0.79  | 0.56  | 0.82  | 0.59  | -0.27 | -0.14 | -0.27 | -0.52 | 0.36  | 0.01  | 0.40  | 0.15  | 0.02 |
| J6NM6  | OS=Homo sapiens<br>GN=LRRRC53 PE=4 SV=2<br>WD repeat-containing<br>protein 46 OS=Homo        | 1  | 0.3 | 0.13  | -0.08 | 0.01  | 0.38  | 0.68  | 0.49  | 0.60  | 0.97  | 0.20  | 0.07  | 0.10  | 0.46  | 0.07  | -0.11 | 0.01  | 0.36  | 0.00 |
| O1521  | sapiens GN=WDR46<br>Neutrophil defensin 1                                                    | 1  | 0.3 | 0.46  | 0.15  | 0.68  | 0.49  | 0.24  | -0.06 | 0.50  | 0.31  | -0.41 | -0.65 | -0.18 | -0.38 | 0.78  | 0.49  | 1.05  | 0.85  | 0.04 |
| P5966E | OS=Homo sapiens<br>GN=DEFA1 PE=1 SV=1 -<br>SPARC OS=Homo                                     | 5  | 0.3 | 0.57  | 0.78  | -0.32 | -0.01 | 0.62  | 0.92  | -0.24 | 0.15  | 0.50  | 0.75  | -0.44 | -0.02 | 0.44  | 0.78  | -0.31 | 0.07  | 0.03 |
| P0948E | sapiens GN=SPARC<br>PE=1 SV=1 -<br>Hemoglobin subunit beta                                   | 11 | 0.3 | -0.04 | 0.58  | -0.11 | 0.06  | 0.35  | 0.96  | 0.35  | 0.54  | 0.05  | 0.66  | -0.03 | 0.10  | 0.02  | 0.69  | -0.04 | 0.08  | 0.01 |
| P6887I | OS=Homo sapiens<br>GN=HBB PE=1 SV=2 -<br>Alpha-tectorin OS=Homo                              | 9  | 0.3 | 0.70  | -0.29 | 0.59  | 0.71  | 0.61  | -0.50 | 0.37  | 0.54  | 0.46  | -0.51 | 0.30  | 0.51  | 0.42  | -0.53 | 0.33  | 0.47  | 0.03 |
| O7544  | sapiens GN=TECTA<br>PE=1 SV=3 -<br>Cytoplasmic dynein 2                                      | 1  | 0.3 | -0.16 | 0.70  | 0.00  | 0.27  | 0.42  | 1.29  | 0.61  | 0.89  | -0.39 | 0.54  | -0.22 | 0.04  | -0.35 | 0.54  | -0.14 | 0.12  | 0.05 |
| J8NCM  | heavy chain 1 OS=Homo<br>sapiens GN=DYNC2H1<br>Ig kappa chain V-III                          | 2  | 0.3 | 0.26  | 0.52  | 0.58  | 0.63  | 0.05  | 0.33  | 0.41  | 0.46  | 0.11  | -0.13 | 0.35  | -0.27 | 0.12  | 0.13  | 0.45  | 0.15  | 0.00 |
| P0443E | region VG (Fragment)<br>OS=Homo sapiens PE=1<br>Protein FAM179B                              | 2  | 0.3 | 0.21  | 0.40  | 0.21  | 0.35  | 0.31  | 0.60  | 0.35  | 0.50  | 0.20  | 0.43  | 0.13  | 0.30  | -0.03 | 0.13  | -0.08 | 0.12  | 0.00 |
| Q9Y4F  | OS=Homo sapiens<br>GN=FAM179B PE=1<br>Centrosomal protein of<br>57 kDa OS=Homo               | 2  | 0.3 | 0.09  | 0.65  | 0.97  | -0.01 | -0.18 | 0.39  | 0.73  | -0.24 | 0.07  | 0.69  | 0.95  | -0.03 | -0.35 | 0.24  | 0.58  | -0.42 | 0.04 |
| J86XR  | sapiens GN=CEP57 PE=1<br>Ig kappa chain V-I region                                           | 1  | 0.3 | 0.03  | -0.42 | 0.03  | -0.03 | 0.89  | 0.46  | 0.93  | 0.87  | 0.47  | 0.10  | 0.49  | 0.41  | 0.06  | -0.35 | 0.12  | 0.04  | 0.02 |
| P0160I | HK101 (Fragment)<br>OS=Homo sapiens PE=4<br>Nucleoporin-62 C-<br>terminal-like protein       | 2  | 0.3 | 0.50  | 0.86  | 0.66  | 0.33  | 0.11  | 0.82  | 0.33  | 0.15  | -0.19 | 0.52  | 0.08  | -0.20 | -0.10 | 0.41  | -0.10 | -0.14 | 0.01 |
| J9H1M  | OS=Homo sapiens<br>GN=NUP62CL PE=2                                                           | 1  | 0.3 | -0.04 | -0.11 | 0.31  | -0.06 | 0.65  | 0.60  | 1.03  | 0.67  | -0.11 | -0.11 | 0.25  | -0.13 | 0.18  | 0.14  | 0.58  | 0.19  | 0.01 |

|        |                                                                                                              |    |      |       |       |       |       |       |       |       |       |       |       |       |       |       |       |       |       |      |
|--------|--------------------------------------------------------------------------------------------------------------|----|------|-------|-------|-------|-------|-------|-------|-------|-------|-------|-------|-------|-------|-------|-------|-------|-------|------|
| Q92821 | Gamma-glutamyl<br>hydrolase OS=Homo<br>sapiens GN=GGH PE=1                                                   | 3  | 0.3  | 0.54  | 0.38  | 0.75  | 0.74  | -0.27 | -0.37 | 0.01  | 0.11  | -0.36 | -0.30 | 0.03  | -0.03 | 0.68  | 0.30  | 0.88  | 0.91  | 0.05 |
| 8WU6   | Thrombospondin-type<br>laminin G domain and<br>EAR repeat-containing<br>protein OS=Homo<br>sapiens GN=TSPEAR | 1  | -0.3 | -0.27 | -0.25 | -0.61 | -0.81 | -0.16 | -0.11 | -0.46 | -0.65 | 0.53  | 0.62  | 0.19  | -0.01 | -0.34 | -0.28 | -0.63 | -0.84 | 0.03 |
| Q969G  | LIM/homeobox protein<br>Lhx4 OS=Homo sapiens<br>GN=LHX4 PE=1 SV=2 -                                          | 1  | -0.3 | -0.42 | -0.16 | -0.38 | -0.19 | -0.20 | 0.08  | -0.12 | 0.07  | -0.52 | -0.19 | -0.47 | -0.29 | -0.51 | -0.22 | -0.41 | -0.24 | 0.00 |
| Q9H21  | DNA replication factor<br>Cdt1 OS=Homo sapiens<br>GN=CDT1 PE=1 SV=3 -                                        | 1  | -0.3 | -0.16 | 0.27  | 0.14  | -0.53 | -0.35 | 0.09  | -0.02 | -0.68 | -0.35 | 0.15  | -0.05 | -0.72 | -0.64 | -0.18 | -0.29 | -0.97 | 0.01 |
| P50851 | Lipopolysaccharide-<br>responsive and beige-like<br>anchor protein OS=Homo<br>sapiens GN=LRBA PE=1           | 1  | -0.3 | -0.46 | -0.09 | -0.53 | -0.71 | -0.69 | -0.30 | -0.73 | -0.89 | 0.19  | 0.63  | 0.12  | -0.06 | -0.25 | 0.15  | -0.27 | -0.46 | 0.02 |
| Q9NT6  | Teneurin-2 OS=Homo<br>sapiens GN=TENM2<br>PE=1 SV=3 -                                                        | 1  | -0.3 | 0.34  | 0.01  | -0.16 | 0.11  | 0.13  | -0.18 | -0.33 | -0.06 | -0.36 | -0.62 | -0.85 | -0.59 | -0.23 | -0.53 | -0.68 | -0.43 | 0.00 |
| P3550  | UDP-<br>glucuronosyltransferase<br>1-3 OS=Homo sapiens                                                       | 1  | -0.3 | -0.34 | 0.63  | 0.17  | -0.07 | -0.98 | 0.01  | -0.43 | -0.67 | -1.06 | -0.02 | -0.54 | -0.79 | -0.56 | 0.44  | 0.01  | -0.25 | 0.04 |
| Q9Y3X  | Coiled-coil domain-<br>containing protein 9<br>OS=Homo sapiens<br>GN=CCDC9 PE=1 SV=1 -                       | 1  | -0.3 | -0.62 | -0.31 | -0.04 | -0.24 | -0.67 | -0.35 | -0.06 | -0.25 | -0.66 | -0.28 | -0.08 | -0.28 | -0.52 | -0.19 | 0.10  | -0.11 | 0.00 |
| A2RU4  | Single-pass membrane<br>and coiled-coil domain-<br>containing protein 3<br>OS=Homo sapiens                   | 1  | -0.3 | 0.21  | 0.47  | -0.36 | 0.24  | -0.26 | 0.02  | -0.79 | -0.18 | -0.48 | 0.43  | -0.45 | -0.44 | -0.72 | -0.42 | -1.23 | -0.65 | 0.03 |
| Q9BXX  | Ankyrin repeat domain-<br>containing protein 30A<br>OS=Homo sapiens<br>GN=ANKRD30A PE=1                      | 1  | -0.3 | -1.24 | -0.99 | -0.86 | -0.85 | -0.37 | -0.10 | 0.05  | 0.06  | 0.08  | 0.40  | 0.47  | 0.47  | -0.73 | -0.45 | -0.30 | -0.31 | 0.05 |
| Q1401  | Coactosin-like protein<br>OS=Homo sapiens<br>GN=COTL1 PE=1 SV=3 -                                            | 1  | -0.3 | -0.36 | 0.22  | -0.87 | -0.51 | -0.05 | 0.20  | -0.73 | -0.16 | 0.11  | 0.42  | -0.59 | -0.04 | -0.56 | -0.05 | -1.21 | -0.53 | 0.02 |
| P0174  | Ig heavy chain V-I region<br>EU OS=Homo sapiens<br>PE=1 SV=1 -                                               | 1  | -0.3 | -0.27 | -0.57 | -0.86 | -0.84 | 0.52  | -0.17 | -0.28 | -0.33 | 0.46  | 0.49  | -0.31 | -0.20 | -0.33 | -0.50 | -0.96 | -0.73 | 0.02 |
| P0709  | Glia-derived nexin<br>OS=Homo sapiens<br>GN=SERPINE2 PE=1                                                    | 2  | -0.3 | -0.17 | 0.19  | -0.62 | -0.60 | 0.08  | 0.46  | -0.34 | -0.32 | -0.40 | 0.03  | -0.85 | -0.84 | -0.32 | 0.08  | -0.72 | -0.71 | 0.01 |
| P7852  | DNA-dependent protein<br>kinase catalytic subunit<br>OS=Homo sapiens<br>GN=PRKDC PE=1 SV=3 -                 | 1  | -0.3 | 0.35  | -0.99 | -0.60 | 0.23  | 0.36  | -0.69 | -0.29 | 0.55  | -0.05 | -1.11 | -0.79 | 0.04  | 0.03  | -1.24 | -0.83 | -0.01 | 0.04 |
| P0177  | Ig heavy chain V-III<br>region HIL OS=Homo<br>sapiens PE=1 SV=1 -                                            | 1  | -0.3 | 0.09  | -1.05 | -0.42 | -0.11 | -0.20 | -1.31 | -0.66 | -0.35 | 0.56  | -0.51 | 0.06  | 0.36  | 0.05  | -1.06 | -0.40 | -0.11 | 0.03 |
| P2438  | Corticotropin-releasing<br>factor-binding protein<br>OS=Homo sapiens<br>GN=CRHBP PE=1 SV=2 -                 | 3  | -0.3 | 0.21  | 0.09  | -0.09 | 0.18  | -0.73 | -0.89 | -0.99 | -0.42 | -0.35 | -0.67 | -0.94 | -0.25 | 0.01  | -0.14 | -0.23 | 0.14  | 0.01 |
| P0160  | Ig kappa chain V-I region<br>Kue OS=Homo sapiens<br>PE=1 SV=1 -                                              | 2  | -0.3 | -0.51 | -0.02 | 0.64  | 0.54  | -1.14 | -0.64 | 0.04  | -0.08 | -1.21 | -0.77 | -0.09 | -0.26 | -1.05 | -0.59 | 0.09  | -0.05 | 0.04 |
| Q1479  | Apolipoprotein L1<br>OS=Homo sapiens<br>GN=APOL1 PE=1 SV=5 -                                                 | 16 | -0.3 | -0.31 | 0.17  | -0.62 | -0.84 | -0.43 | -0.04 | -0.74 | -0.99 | -0.02 | 0.43  | -0.34 | -0.34 | 0.04  | 0.29  | -0.60 | -0.78 | 0.01 |
| P2081  | Calpastatin OS=Homo<br>sapiens GN=CAST PE=1<br>SV=4 - [ICAL_HUMAN]                                           | 1  | -0.3 | 0.25  | 0.15  | -0.49 | -0.02 | 0.04  | 0.23  | -0.39 | 0.08  | -0.59 | -0.34 | -1.04 | -0.58 | -0.60 | -0.39 | -1.01 | -0.56 | 0.01 |
| P4913  | MAP kinase-activated<br>protein kinase 2<br>OS=Homo sapiens<br>GN=MAPKAP2 PE=1                               | 2  | -0.3 | -0.38 | -0.62 | -0.67 | -0.36 | -0.33 | -0.54 | -0.58 | -0.26 | -0.45 | -0.61 | -0.74 | -0.43 | 0.26  | 0.05  | 0.02  | 0.32  | 0.00 |
| P1211  | Collagen alpha-3(VI)<br>chain OS=Homo sapiens<br>GN=COL6A3 PE=1 SV=5                                         | 5  | -0.3 | 0.12  | -0.50 | -0.21 | -0.53 | 0.08  | -0.63 | -0.37 | -0.59 | 0.37  | -0.33 | 0.04  | -0.28 | -0.34 | -0.86 | -0.51 | -0.79 | 0.00 |

|        |                                                                                                                                                                                               |    |      |       |       |       |       |       |       |       |       |       |       |       |       |       |       |       |       |      |
|--------|-----------------------------------------------------------------------------------------------------------------------------------------------------------------------------------------------|----|------|-------|-------|-------|-------|-------|-------|-------|-------|-------|-------|-------|-------|-------|-------|-------|-------|------|
| P0074C | Coagulation factor IX<br>OS=Homo sapiens<br>GN=F9 PE=1 SV=2 -<br>Ryanodine receptor 3                                                                                                         | 9  | -0.3 | -0.66 | -0.93 | -0.61 | -0.60 | -0.29 | -0.52 | -0.26 | -0.13 | -0.31 | -0.52 | -0.42 | -0.34 | 0.27  | -0.23 | -0.03 | 0.21  | 0.00 |
| Q1541L | OS=Homo sapiens<br>GN=RYR3 PE=1 SV=3 -<br>Signal transducer and<br>activator of transcription<br>2 OS=Homo sapiens<br>GN=STAT2 PE=1 SV=1 -<br>Glyceraldehyde-3-<br>phosphate<br>dehydrogenase | 1  | -0.3 | -0.79 | -0.99 | -0.07 | -0.46 | -0.83 | -1.02 | -0.08 | -0.46 | -0.44 | -0.58 | 0.28  | -0.11 | -0.20 | -0.37 | 0.57  | 0.16  | 0.01 |
| P5263C | OS=Homo sapiens<br>GN=STAT2 PE=1 SV=1 -<br>Glyceraldehyde-3-<br>phosphate<br>dehydrogenase                                                                                                    | 1  | -0.3 | -0.34 | -1.39 | -0.79 | -0.78 | -0.06 | -1.09 | -0.47 | -0.46 | 0.48  | -0.50 | 0.04  | 0.04  | 0.43  | -0.58 | 0.04  | 0.04  | 0.02 |
| P0440E | OS=Homo sapiens<br>Phospholipase DDHD2                                                                                                                                                        | 3  | -0.3 | -0.23 | -0.80 | -0.22 | 0.19  | -0.27 | -1.03 | -0.68 | 0.05  | -0.43 | -1.42 | -0.79 | -0.35 | 0.12  | -0.40 | 0.15  | 0.72  | 0.02 |
| Q9483I | OS=Homo sapiens<br>GN=DDHD2 PE=1 SV=2 -<br>Mannan-binding lectin<br>serine protease 2                                                                                                         | 1  | -0.3 | -0.35 | -0.12 | -0.38 | -0.67 | 0.12  | 0.37  | 0.12  | -0.16 | -0.78 | -0.47 | -0.80 | -1.10 | -0.31 | -0.05 | -0.29 | -0.59 | 0.00 |
| Q0018L | OS=Homo sapiens<br>GN=MASP2 PE=1 SV=4 -<br>FRAS1-related<br>extracellular matrix<br>protein 3 OS=Homo<br>sapiens GN=FREM3                                                                     | 8  | -0.3 | 0.19  | -0.06 | -0.28 | -0.76 | 0.21  | -0.36 | -0.35 | -0.70 | 0.15  | -0.21 | -0.30 | -0.81 | -0.13 | -0.53 | -0.54 | -1.01 | 0.00 |
| P0C09L | OS=Homo sapiens<br>GN=FREM3<br>Uromodulin OS=Homo<br>sapiens GN=UMOD                                                                                                                          | 1  | -0.4 | 0.50  | 0.01  | -0.40 | -0.10 | 0.26  | -0.21 | -0.60 | -0.30 | -0.32 | -0.73 | -1.21 | -0.91 | 0.06  | -0.39 | -0.78 | -0.50 | 0.01 |
| P07911 | ADP-ribosylation factor<br>GTPase-activating<br>protein 2 OS=Homo<br>sapiens GN=ARFGAP2                                                                                                       | 1  | -0.4 | -0.22 | 0.31  | -0.14 | -0.38 | -0.69 | -0.11 | -0.60 | -0.83 | -0.89 | -0.26 | -0.86 | -1.16 | -0.04 | 0.46  | 0.04  | -0.25 | 0.01 |
| Q8N6H  | ADP-ribosylation factor<br>GTPase-activating<br>protein 2 OS=Homo<br>sapiens GN=ARFGAP2                                                                                                       | 1  | -0.4 | 0.04  | -0.33 | 0.07  | 0.07  | -0.31 | -0.65 | -0.24 | -0.22 | -0.54 | -0.84 | -0.51 | -0.51 | -0.38 | -0.71 | -0.29 | -0.30 | 0.00 |
| P1225E | Coagulation factor V<br>OS=Homo sapiens<br>GN=F5 PE=1 SV=4 -<br>Dual 3',5'-cyclic-AMP and<br>-GMP phosphodiesterase<br>11A OS=Homo sapiens<br>GN=PDE11A PE=1 SV=2                             | 31 | -0.4 | 0.15  | 0.09  | -0.35 | -0.09 | -0.22 | -0.31 | -0.86 | -0.49 | -0.19 | -0.39 | -0.95 | -0.56 | -0.22 | -0.19 | -0.67 | -0.44 | 0.00 |
| Q9HCR  | V(D)J recombination-<br>activating protein 2<br>OS=Homo sapiens<br>GN=RAG2 PE=1 SV=1 -<br>Testis-expressed<br>sequence 10 protein                                                             | 2  | -0.4 | -0.09 | -0.02 | -0.15 | -0.34 | -0.46 | -0.37 | -0.48 | -0.67 | -0.43 | -0.29 | -0.48 | -0.68 | -0.28 | -0.18 | -0.29 | -0.49 | 0.00 |
| P5589E | OS=Homo sapiens<br>GN=RAG2 PE=1 SV=1 -<br>Testis-expressed<br>sequence 10 protein                                                                                                             | 1  | -0.4 | -0.70 | -0.08 | -0.60 | -0.65 | -0.38 | 0.26  | -0.20 | -0.18 | -0.22 | 0.29  | -0.31 | -0.34 | -0.68 | -0.30 | -0.89 | -0.75 | 0.00 |
| Q9NXF  | OS=Homo sapiens<br>GN=TEX10 PE=1 SV=2 -<br>Ankyrin repeat domain-<br>containing protein 2                                                                                                     | 1  | -0.4 | -0.52 | -0.43 | -0.58 | -0.79 | 0.03  | 0.13  | -0.16 | -0.41 | -0.33 | -0.17 | -0.38 | -0.59 | -0.34 | -0.23 | -0.38 | -0.58 | 0.00 |
| Q9GZV  | OS=Homo sapiens<br>GN=ANKRD2 PE=1<br>Adenylate cyclase type 1                                                                                                                                 | 1  | -0.4 | 0.00  | -0.06 | -0.54 | -0.65 | -0.26 | -0.30 | -0.76 | -0.87 | 0.06  | 0.07  | -0.47 | -0.59 | -0.07 | -0.10 | -0.56 | -0.69 | 0.00 |
| Q0882I | OS=Homo sapiens<br>GN=ADCY1 PE=1 SV=2 -<br>Group XIIb secretory<br>phospholipase A2-like<br>protein OS=Homo<br>sapiens GN=PLA2G12B                                                            | 1  | -0.4 | 0.05  | 0.28  | -0.16 | -0.25 | -0.03 | 0.22  | -0.20 | -0.29 | -0.74 | -0.44 | -0.94 | -1.04 | -0.53 | -0.27 | -0.68 | -0.79 | 0.00 |
| Q9BX9L | OS=Homo sapiens<br>GN=PLA2G12B<br>Phytanoyl-CoA<br>dioxygenase,                                                                                                                               | 1  | -0.4 | -0.21 | -0.58 | -0.51 | -1.36 | -0.08 | -0.42 | -0.34 | -1.18 | -0.18 | -0.48 | -0.48 | -1.33 | 0.75  | 0.41  | 0.50  | -0.36 | 0.03 |
| Q1483I | OS=Homo sapiens<br>GN=PHYH PE=1<br>Collectin-11 OS=Homo<br>sapiens GN=COLEC11                                                                                                                 | 1  | -0.4 | -1.05 | 0.21  | 0.34  | 0.09  | -1.07 | 0.21  | 0.35  | 0.11  | -1.51 | -0.18 | -0.12 | -0.38 | -1.70 | -0.41 | -0.27 | -0.53 | 0.04 |
| Q9BWP  | OS=Homo sapiens<br>GN=COLEC11<br>PE=1 SV=1 -<br>Dermokine OS=Homo<br>sapiens GN=DMKN                                                                                                          | 1  | -0.4 | -0.58 | -0.74 | -0.12 | 0.03  | -1.21 | -1.35 | -0.71 | -0.56 | -0.68 | -0.77 | -0.21 | -0.07 | 0.00  | -0.13 | 0.52  | 0.65  | 0.02 |
| Q6E0U  | OS=Homo sapiens<br>GN=DMKN<br>PE=1 SV=3 -<br>Rho GTPase-activating<br>protein 36 OS=Homo<br>sapiens GN=ARHGAP36                                                                               | 2  | -0.4 | -0.72 | 0.05  | -0.95 | -0.04 | -0.48 | 0.31  | -0.66 | 0.25  | -1.05 | -0.20 | -1.26 | -0.36 | -0.57 | 0.24  | -0.74 | 0.16  | 0.01 |
| Q6ZRIL | OS=Homo sapiens<br>GN=ARHGAP36                                                                                                                                                                | 2  | -0.4 | 0.62  | -1.01 | -1.03 | -0.58 | 1.05  | -0.56 | -0.56 | -0.11 | 0.52  | -1.04 | -1.12 | -0.68 | 0.69  | -0.91 | -0.91 | -0.47 | 0.05 |

|        |                                                                                                              |    |      |       |       |       |       |       |       |       |       |       |       |       |       |       |       |       |       |      |
|--------|--------------------------------------------------------------------------------------------------------------|----|------|-------|-------|-------|-------|-------|-------|-------|-------|-------|-------|-------|-------|-------|-------|-------|-------|------|
| 06ZV7  | FVE, RhoGEF and PH domain-containing protein<br>6 OS=Homo sapiens<br>GN=FGD6 PE=1 SV=2 - Zinc finger and BTB | 1  | -0.4 | 0.10  | 0.29  | -0.30 | -0.26 | -0.57 | -0.36 | -0.94 | -0.89 | -0.85 | -0.59 | -1.24 | -1.21 | 0.29  | 0.52  | -0.06 | -0.03 | 0.01 |
| 09NUA  | domain-containing protein<br>40 OS=Homo sapiens<br>GN=ZBTB40 PE=1 SV=4<br>Vitronectin OS=Homo                | 2  | -0.4 | 0.07  | 0.43  | 0.71  | -0.06 | -0.71 | -0.33 | -0.04 | -0.80 | -1.02 | -0.58 | -0.37 | -1.15 | -0.82 | -0.42 | -0.13 | -0.92 | 0.01 |
| 04004  | sapiens GN=VTN PE=1 SV=1 - [VTNC_HUMAN]<br>Melanoma-associated                                               | 17 | -0.4 | -0.48 | -0.58 | -0.01 | -0.01 | -1.10 | -0.99 | -0.56 | -0.51 | -1.02 | -1.06 | -0.33 | -0.29 | 0.27  | -0.05 | 0.23  | 0.32  | 0.01 |
| 09UNF  | antigen D2 OS=Homo sapiens GN=MAGED2<br>Charged multivesicular                                               | 1  | -0.4 | -0.98 | 0.23  | 0.23  | -0.22 | -1.21 | 0.02  | 0.05  | -0.41 | -1.57 | -0.29 | -0.34 | -0.81 | -1.08 | 0.16  | 0.18  | -0.29 | 0.01 |
| 096FZ  | body protein 6 OS=Homo sapiens GN=CHMP6<br>PE=1 SV=3 -<br>Toll-like receptor 5                               | 1  | -0.4 | -0.68 | -0.53 | -0.36 | 0.19  | -0.23 | -0.06 | 0.12  | 0.68  | -1.09 | -0.87 | -0.77 | -0.22 | -1.03 | -0.85 | -0.66 | -0.13 | 0.00 |
| 06060  | OS=Homo sapiens<br>GN=TLR5 PE=1 SV=4 -<br>Nostrin OS=Homo                                                    | 1  | -0.4 | -0.40 | -0.35 | -0.99 | -0.97 | 0.33  | 0.39  | -0.22 | -0.20 | -0.36 | -0.25 | -0.94 | -0.93 | -0.16 | -0.08 | -0.69 | -0.69 | 0.00 |
| 081V5  | sapiens GN=NOSTRIN<br>PE=1 SV=2 -<br>Potassium voltage-gated                                                 | 1  | -0.4 | -0.22 | -0.31 | -0.16 | 0.49  | -0.86 | -0.94 | -0.76 | -0.11 | -0.58 | -0.61 | -0.52 | 0.13  | -0.74 | -0.80 | -0.63 | 0.00  | 0.00 |
| 048547 | channel subfamily C member 1 OS=Homo sapiens GN=KCNC1<br>WD repeat-containing                                | 1  | -0.4 | 0.00  | -0.91 | -0.16 | 0.08  | -0.32 | -1.22 | -0.44 | -0.19 | -0.91 | -1.76 | -1.07 | -0.83 | 0.50  | -0.39 | 0.39  | 0.61  | 0.03 |
| 096KV  | protein 90 OS=Homo sapiens GN=WDR90<br>Protein-methionine                                                    | 1  | -0.4 | -0.28 | 0.42  | 1.34  | 0.01  | -1.61 | -0.89 | 0.05  | -1.15 | -1.23 | -0.45 | 0.40  | -0.81 | -1.32 | -0.59 | 0.35  | -0.87 | 0.05 |
| 07RTP  | sulfoxide oxidase<br>MICAL3 OS=Homo sapiens GN=MICAL3<br>Ig heavy chain V-II                                 | 1  | -0.4 | -0.73 | -0.54 | 0.72  | -0.28 | -1.78 | -1.58 | -0.29 | -1.28 | -1.12 | -0.87 | 0.34  | -0.67 | -0.25 | -0.03 | 1.25  | 0.24  | 0.05 |
| 066331 | region ARH-77<br>OS=Homo sapiens PE=4<br>Arf-GAP with Rho-GAP                                                | 2  | -0.4 | -0.40 | -0.45 | -0.41 | -0.66 | -0.28 | 0.03  | 0.03  | -0.13 | -0.89 | -0.78 | -0.80 | -1.06 | -0.29 | -0.29 | -0.10 | -0.59 | 0.00 |
| 096P4  | domain-containing protein 1 OS=Homo sapiens GN=ARAP1<br>Sacsin OS=Homo                                       | 1  | -0.4 | 0.02  | 0.69  | -0.25 | -0.78 | -1.27 | -0.61 | -1.35 | -1.90 | -0.10 | 0.47  | -0.36 | -0.90 | -0.06 | 0.41  | -0.34 | -0.82 | 0.02 |
| 09NZ3  | sapiens GN=SACS PE=1<br>Vitamin K-dependent                                                                  | 3  | -0.4 | -0.62 | 0.09  | -0.99 | -0.51 | -0.09 | 0.65  | -0.41 | 0.07  | -1.04 | -0.26 | -1.40 | -0.93 | -0.58 | 0.16  | -0.90 | -0.43 | 0.00 |
| 022891 | protein Z OS=Homo sapiens GN=PROZ PE=1<br>Brefeldin A-inhibited                                              | 3  | -0.4 | -0.55 | -0.10 | -0.27 | -0.26 | -0.21 | 0.43  | -0.16 | -0.23 | -0.73 | -0.07 | -1.13 | -1.70 | -0.86 | -0.32 | -0.43 | -0.60 | 0.00 |
| 09Y6D  | exchange protein 1 OS=Homo sapiens<br>Complement C4-B                                                        | 2  | -0.5 | -0.65 | -2.01 | -0.49 | -0.54 | -0.27 | -1.61 | -0.07 | -0.12 | -0.43 | -1.71 | -0.25 | -0.31 | 0.54  | -0.78 | 0.76  | 0.70  | 0.04 |
| 0C0L   | OS=Homo sapiens<br>GN=C4B PE=1 SV=2 -<br>Target of EGR1 protein 1                                            | 4  | -0.5 | -0.78 | -1.23 | 0.31  | -0.60 | -1.18 | -1.55 | 0.24  | -0.78 | -1.13 | -1.63 | 0.33  | -0.87 | 0.19  | -0.45 | 1.42  | 0.36  | 0.05 |
| 096GM  | OS=Homo sapiens<br>GN=TOE1 PE=1 SV=1 -<br>Transmembrane protein                                              | 1  | -0.5 | -0.73 | -0.11 | -0.22 | -0.70 | -0.97 | -0.33 | -0.42 | -0.90 | -0.37 | 0.33  | 0.15  | -0.33 | -1.04 | -0.38 | -0.48 | -0.97 | 0.00 |
| 02VDJ  | 131-like OS=Homo sapiens<br>GN=KIAA0922<br>Coiled-coil domain-                                               | 1  | -0.5 | 0.05  | -0.22 | 0.11  | -0.13 | -0.79 | -1.03 | -0.69 | -0.92 | -0.59 | -0.78 | -0.52 | -0.76 | -0.27 | -0.50 | -0.16 | -0.41 | 0.00 |
| 096ER  | containing protein 51 OS=Homo sapiens<br>GN=CCDC51 PE=1<br>Phosphatidylethanolamine-                         | 1  | -0.5 | -1.32 | -0.93 | -1.19 | -1.04 | -0.52 | -0.11 | -0.35 | -0.20 | -0.51 | -0.05 | -0.37 | -0.23 | -0.45 | -0.02 | -0.26 | -0.13 | 0.00 |
| 096S9  | binding protein 4 OS=Homo sapiens<br>GN=PEBP4 PE=1 SV=3 -<br>Ig kappa chain V-I region                       | 6  | -0.5 | -0.64 | -1.08 | -0.92 | 0.01  | -0.42 | -1.20 | -0.53 | 0.19  | -0.76 | -1.30 | -0.68 | 0.00  | -0.03 | -0.37 | -0.30 | 0.34  | 0.00 |
| 0159   | Gal OS=Homo sapiens<br>PE=1 SV=1 -                                                                           | 1  | -0.5 | 0.83  | -0.34 | 0.08  | 0.08  | 0.44  | -0.71 | -0.27 | -0.26 | -0.98 | -2.08 | -1.73 | -1.73 | 0.37  | -0.77 | -0.33 | -0.34 | 0.03 |

| Gene ID | Gene Name                                                        | Species      | SV | PE | 1    | 2     | 3     | 4     | 5     | 6     | 7     | 8     | 9     | 10    | 11    | 12    | 13    | 14    | 15    |       |       |      |
|---------|------------------------------------------------------------------|--------------|----|----|------|-------|-------|-------|-------|-------|-------|-------|-------|-------|-------|-------|-------|-------|-------|-------|-------|------|
| P01596  | Ig kappa chain V-I region<br>CAR                                 | Homo sapiens | 1  | 1  | -0.5 | -0.45 | -0.29 | -0.30 | 0.45  | -1.01 | -0.83 | -0.82 | -0.06 | -0.79 | -0.56 | -0.62 | 0.12  | -1.02 | -0.82 | -0.81 | -0.07 | 0.00 |
| J5MNZ   | WD repeat domain<br>phosphoinositide-<br>interacting protein 1   | Homo sapiens | 2  | 1  | -0.5 | 0.47  | -0.29 | -0.67 | -1.31 | 0.54  | -0.71 | -0.60 | -1.24 | -0.02 | -1.22 | -1.20 | -1.85 | 1.02  | 0.30  | -0.24 | -0.90 | 0.03 |
| J8WX9   | Negative elongation<br>factor B                                  | Homo sapiens | 1  | 1  | -0.5 | 0.01  | -0.01 | -1.06 | -0.80 | -0.26 | -0.35 | -1.37 | -0.68 | 0.54  | 0.13  | -0.97 | -0.09 | -0.35 | -0.34 | -1.36 | -1.11 | 0.00 |
| O1492L  | Histone<br>acetyltransferase type B<br>catalytic subunit         | Homo sapiens | 1  | 1  | -0.5 | 0.16  | 0.04  | 0.32  | 0.11  | -0.82 | -0.92 | -0.63 | -0.82 | -0.51 | -0.56 | -0.35 | -0.56 | -0.91 | -1.00 | -0.70 | -0.92 | 0.00 |
| Q9275L  | Nuclear receptor ROR-<br>beta                                    | Homo sapiens | 1  | 1  | -0.5 | -0.03 | -0.59 | -0.77 | -0.23 | 0.24  | -0.30 | -0.46 | 0.09  | 0.00  | -0.49 | -0.73 | -0.20 | -0.83 | -1.35 | -1.51 | -0.98 | 0.00 |
| J5W0B   | Transmembrane protein<br>236                                     | Homo sapiens | 1  | 2  | -0.5 | -0.31 | -0.14 | -0.70 | -0.58 | 0.36  | 0.55  | 0.00  | 0.13  | -0.76 | -0.52 | -1.15 | -1.04 | -0.90 | -0.70 | -1.24 | -1.14 | 0.00 |
| J8NA4   | Coiled-coil domain-<br>containing protein 63                     | Homo sapiens | 1  | 2  | -0.5 | -0.92 | -1.30 | -1.29 | -0.13 | -0.01 | -0.64 | -0.61 | 0.55  | 0.12  | -1.35 | -1.41 | -0.26 | 0.14  | -0.76 | -0.73 | 0.41  | 0.01 |
| O6050I  | Nephrin                                                          | Homo sapiens | 1  | 1  | -0.5 | -0.58 | -1.22 | -1.59 | -0.76 | -0.12 | -0.74 | -1.09 | -0.25 | 0.41  | -0.15 | -0.59 | 0.24  | -0.02 | -0.63 | -0.98 | -0.16 | 0.00 |
| Q8IXS2  | Coiled-coil domain-<br>containing protein 65                     | Homo sapiens | 1  | 1  | -0.5 | -0.45 | -0.32 | -0.42 | -1.03 | -0.48 | -0.32 | -0.41 | -1.01 | -0.38 | -0.17 | -0.35 | -0.96 | -0.41 | -0.24 | -0.33 | -0.95 | 0.00 |
| J9NQ8   | Uncharacterized protein<br>C12orf4                               | Homo sapiens | 1  | 1  | -0.5 | -0.56 | -0.49 | -0.40 | -0.29 | -0.63 | -0.53 | -0.42 | -0.32 | -0.75 | -0.61 | -0.58 | -0.48 | -0.71 | -0.61 | -0.49 | -0.41 | 0.00 |
| J6Y7W   | PERQ amino acid-rich<br>with GYF domain-<br>containing protein 2 | Homo sapiens | 1  | 1  | -0.5 | -0.54 | -1.10 | 0.79  | 0.01  | -1.35 | -1.95 | -0.18 | -0.78 | -1.24 | -1.74 | -0.26 | -0.64 | -0.21 | -0.77 | 0.96  | 0.67  | 0.03 |
| P0516E  | Propionyl-CoA<br>carboxylase alpha chain,<br>mitochondrial       | Homo sapiens | 1  | 1  | -0.5 | -0.04 | 0.24  | -0.02 | 0.38  | -0.01 | 0.45  | 0.21  | 0.45  | -2.10 | -1.83 | -2.15 | -2.31 | -0.65 | -0.27 | -0.51 | -0.19 | 0.05 |
| Q6IA8I  | Elongator complex<br>protein 2                                   | Homo sapiens | 1  | 1  | -0.5 | -0.57 | -2.07 | -1.09 | -0.47 | 0.05  | -1.43 | -0.44 | 0.19  | 0.50  | -0.93 | -0.02 | 0.59  | -0.21 | -1.68 | -0.68 | -0.08 | 0.02 |
| J9BV7   | Centrosome-associated<br>protein CEP250                          | Homo sapiens | 1  | 2  | -0.5 | 0.35  | -0.56 | 0.58  | 1.47  | -1.21 | -2.10 | -0.95 | -0.05 | -0.92 | -1.76 | -0.69 | 0.19  | -0.82 | -1.69 | -0.54 | 0.34  | 0.05 |
| P0274I  | C-reactive protein<br>OS                                         | Homo sapiens | 8  | 1  | -0.5 | -0.38 | 0.24  | -0.38 | -1.11 | -0.78 | -0.03 | -0.78 | -1.52 | 0.27  | 1.07  | 0.19  | -0.48 | -1.26 | -0.50 | -1.15 | -1.89 | 0.01 |
| P3317E  | Kinesin-1 heavy chain<br>OS                                      | Homo sapiens | 1  | 1  | -0.5 | 0.26  | -0.14 | -0.12 | -0.63 | 0.33  | -1.44 | -0.03 | -0.51 | -0.19 | -2.03 | -0.70 | -1.07 | -0.64 | -0.76 | 0.65  | -1.49 | 0.01 |
| P4789E  | Aldehyde dehydrogenase<br>family 1 member A3                     | Homo sapiens | 1  | 1  | -0.5 | 0.28  | -1.66 | -0.89 | -0.92 | 0.79  | -1.13 | -0.34 | -0.37 | 0.76  | -1.11 | -0.41 | -0.45 | 0.25  | -1.66 | -0.87 | -0.92 | 0.01 |
| Q1499J  | Proteasome activator<br>complex subunit 4                        | Homo sapiens | 1  | 2  | -0.5 | -0.73 | -1.29 | -1.52 | -1.60 | 0.52  | -0.03 | -0.24 | -0.31 | 0.61  | 0.12  | -0.17 | -0.26 | -0.41 | -0.94 | -1.15 | -1.24 | 0.01 |
| J9GZP   | Platelet-derived growth<br>factor D                              | Homo sapiens | 1  | 1  | -0.5 | -0.50 | -0.46 | -0.68 | -0.33 | -0.97 | -0.92 | -1.12 | -0.76 | -0.48 | -0.38 | -0.66 | -0.31 | -0.33 | -0.26 | -0.46 | -0.12 | 0.00 |
| Q86YJ   | Ankyrin repeat domain-<br>containing protein 13B                 | Homo sapiens | 1  | 1  | -0.5 | -0.19 | -0.31 | -1.57 | -0.69 | -0.22 | -0.32 | -1.56 | -0.67 | -0.73 | -0.78 | -2.10 | -1.23 | 0.86  | 0.78  | -0.46 | 0.40  | 0.02 |

|       |                                                                                         |   |      |       |       |       |       |       |       |       |       |       |       |       |       |       |       |       |       |      |
|-------|-----------------------------------------------------------------------------------------|---|------|-------|-------|-------|-------|-------|-------|-------|-------|-------|-------|-------|-------|-------|-------|-------|-------|------|
| 15D8W | Cilia- and flagella-associated protein 69<br>OS=Homo sapiens<br>GN=CFAP69 PE=2 SV=3     | 1 | -0.5 | -0.53 | -0.33 | -1.45 | -0.47 | -0.17 | 0.05  | -1.05 | -0.06 | -0.49 | -0.22 | -1.40 | -0.42 | -0.43 | -0.20 | -1.30 | -0.33 | 0.00 |
| 296RT | Gamma-tubulin complex component 6<br>OS=Homo sapiens<br>GN=TUBGCP6 PE=1 SV=3            | 1 | -0.6 | 0.09  | -1.14 | -0.78 | -1.32 | 0.14  | -1.07 | -0.70 | -1.23 | 0.72  | -0.43 | -0.15 | -0.69 | 0.27  | -0.93 | -0.55 | -1.10 | 0.00 |
| 255YC | Clavesin-2<br>OS=Homo sapiens<br>GN=CLVS2 PE=2 SV=1                                     | 1 | -0.6 | -0.55 | -0.65 | -1.42 | -2.26 | 0.70  | 0.62  | -0.13 | -0.97 | 0.37  | 0.35  | -0.49 | -1.34 | -0.17 | -0.23 | -0.98 | -1.84 | 0.02 |
| 21467 | KN motif and ankyrin repeat domain-containing protein 1<br>OS=Homo sapiens<br>GN=KANK1  | 1 | -0.6 | -0.90 | -0.12 | -0.25 | -0.29 | -1.01 | -0.40 | -0.51 | -0.59 | -0.79 | -0.26 | -0.28 | -0.51 | -1.10 | -0.54 | -0.61 | -0.86 | 0.00 |
| 24922 | Protein-glutamine gamma-glutamyltransferase 4<br>OS=Homo sapiens<br>GN=TGM4 PE=1 SV=2   | 2 | -0.6 | 0.12  | 0.23  | -0.07 | -0.88 | -0.24 | -0.11 | -0.39 | -1.20 | -0.66 | -0.48 | -0.85 | -1.67 | -0.47 | -0.33 | -0.61 | -1.44 | 0.00 |
| 295Q  | General transcription factor 3C polypeptide 3<br>OS=Homo sapiens<br>GN=GTFC3 PE=1 SV=1  | 1 | -0.6 | -0.63 | 0.49  | 0.57  | -1.64 | -1.13 | 0.01  | 0.11  | -2.09 | -0.46 | 0.73  | 0.75  | -1.46 | -1.44 | -0.29 | -0.18 | -2.40 | 0.04 |
| 21122 | Mannose-binding protein C<br>OS=Homo sapiens<br>GN=MBL2 PE=1 SV=2                       | 4 | -0.6 | -0.09 | -0.70 | -0.01 | 0.59  | -0.65 | -1.45 | -0.84 | -0.12 | -0.60 | -1.16 | -0.65 | 0.04  | -0.93 | -1.44 | -0.87 | -0.20 | 0.00 |
| 20188 | Ig delta chain C region<br>OS=Homo sapiens<br>GN=IGHD PE=1 SV=2                         | 5 | -0.6 | 0.52  | -1.52 | -0.24 | 0.02  | -0.64 | -2.59 | -1.30 | -1.07 | -0.34 | -2.12 | -0.81 | -0.84 | 1.07  | -0.58 | 0.51  | 0.84  | 0.04 |
| 28N20 | Integrator complex subunit 1<br>OS=Homo sapiens<br>GN=INTS1 PE=1                        | 1 | -0.6 | -0.28 | 0.22  | 0.01  | 0.10  | -1.23 | -0.71 | -0.90 | -0.81 | -0.78 | -0.21 | -0.49 | -0.40 | -1.23 | -0.70 | -0.89 | -0.81 | 0.00 |
| 25363 | Dipeptidyl peptidase 1<br>OS=Homo sapiens<br>GN=CTSC PE=1 SV=2                          | 1 | -0.6 | -0.38 | 0.05  | -0.33 | -0.85 | -0.33 | 0.12  | -0.24 | -0.75 | -1.04 | -0.54 | -0.98 | -1.50 | -0.63 | -0.16 | -0.52 | -1.05 | 0.00 |
| 29UL1 | Sarcosine dehydrogenase, mitochondrial<br>OS=Homo sapiens<br>GN=SARDH                   | 1 | -0.6 | -0.88 | 0.26  | -1.01 | -1.88 | -1.20 | -0.04 | -1.29 | -2.16 | 0.26  | 1.47  | 0.14  | -0.74 | -0.58 | 0.60  | -0.65 | -1.54 | 0.03 |
| 29BUN | Protein MENT<br>OS=Homo sapiens<br>GN=MENT PE=2 SV=1                                    | 3 | -0.6 | -0.89 | -0.60 | -1.30 | -0.94 | -0.63 | -0.33 | -1.00 | -0.63 | -0.22 | 0.13  | -0.63 | -0.27 | -0.48 | -0.17 | -0.84 | -0.50 | 0.00 |
| 22TB1 | Zinc finger protein 800<br>OS=Homo sapiens<br>GN=ZNF800 PE=1 SV=1                       | 1 | -0.6 | 0.32  | 1.03  | -0.48 | -0.18 | -0.42 | 0.31  | -1.18 | -0.87 | -0.81 | -0.04 | -1.61 | -1.31 | -0.92 | -0.18 | -1.67 | -1.38 | 0.01 |
| 2724V | Zinc finger protein 438<br>OS=Homo sapiens<br>GN=ZNF438 PE=2 SV=1                       | 1 | -0.6 | -0.03 | -0.03 | -0.09 | -0.02 | -0.32 | -0.30 | -0.34 | -0.27 | -1.50 | -1.43 | -1.55 | -1.49 | -0.54 | -0.51 | -0.54 | -0.49 | 0.00 |
| 296P4 | Collagen alpha-1(XI) chain<br>OS=Homo sapiens<br>GN=COL21A1 PE=2                        | 1 | -0.6 | 0.38  | 0.20  | -0.22 | -0.79 | 0.09  | -0.07 | -0.47 | -1.04 | -0.07 | -0.17 | -0.66 | -1.23 | -0.90 | -1.04 | -1.44 | -2.03 | 0.00 |
| 21531 | DNA-directed RNA polymerase III subunit RPC7<br>OS=Homo sapiens<br>GN=POLR3G PE=1 SV=2  | 1 | -0.6 | -0.23 | -0.63 | -0.94 | -0.36 | -0.15 | -0.53 | -0.82 | -0.24 | -0.61 | -0.94 | -1.31 | -0.74 | -0.25 | -0.62 | -0.91 | -0.35 | 0.00 |
| 24G0X | Coiled-coil domain-containing protein 40<br>OS=Homo sapiens<br>GN=CCDC40 PE=2           | 1 | -0.6 | -0.14 | -0.92 | -0.25 | 0.39  | -0.77 | -1.41 | -0.63 | 0.05  | -1.72 | -2.46 | -1.69 | -1.02 | 0.33  | -0.46 | 0.12  | 0.96  | 0.02 |
| 296MR | Cilia- and flagella-associated protein 57<br>OS=Homo sapiens<br>GN=CFAP57 PE=1 SV=3     | 1 | -0.6 | -1.07 | -0.22 | -0.91 | -0.95 | -0.95 | -0.07 | -0.74 | -0.78 | -0.62 | 0.31  | -0.45 | -0.49 | -1.00 | -0.12 | -0.78 | -0.84 | 0.00 |
| 24874 | Mannan-binding lectin serine protease 1<br>OS=Homo sapiens<br>GN=MASP1 PE=1 SV=3        | 2 | -0.6 | -1.06 | -0.85 | 0.19  | 0.61  | -1.98 | -1.75 | -0.70 | -0.27 | -1.83 | -1.55 | -0.57 | -0.16 | -0.75 | -0.51 | 0.55  | 0.95  | 0.02 |
| 20026 | Transcription initiation factor TFIID subunit 4<br>OS=Homo sapiens<br>GN=TAF4 PE=1 SV=2 | 1 | -0.6 | -0.61 | -0.16 | -1.69 | 0.30  | -0.36 | 0.11  | -1.39 | 0.60  | -0.75 | -0.23 | -1.82 | 0.17  | -1.11 | -0.63 | -2.14 | -0.16 | 0.01 |

|        |                                                                                                                                                                                                                                                     |   |      |       |       |       |       |       |       |       |       |       |       |       |       |       |       |       |       |      |
|--------|-----------------------------------------------------------------------------------------------------------------------------------------------------------------------------------------------------------------------------------------------------|---|------|-------|-------|-------|-------|-------|-------|-------|-------|-------|-------|-------|-------|-------|-------|-------|-------|------|
| Q8N2I1 | Serine/threonine-protein kinase 40 OS=Homo sapiens GN=STK40                                                                                                                                                                                         | 1 | -0.6 | 0.15  | -0.25 | -0.67 | -0.87 | 0.24  | -0.14 | -0.54 | -0.73 | -0.51 | -0.84 | -1.32 | -1.52 | -0.20 | -0.56 | -0.96 | -1.17 | 0.00 |
| Q9Y5W1 | Sorting nexin-13 OS=Homo sapiens GN=SNX13 PE=1 SV=4 - Bifunctional heparan sulfate N-deacetylase/N-sulfotransferase 1 OS=Homo sapiens                                                                                                               | 1 | -0.6 | -0.68 | -0.05 | -1.03 | -0.93 | -0.04 | 0.61  | -0.35 | -0.24 | -0.20 | 0.51  | -0.54 | -0.45 | -1.67 | -1.00 | -1.96 | -1.88 | 0.01 |
| P5284E | Uncharacterized protein                                                                                                                                                                                                                             | 1 | -0.6 | -0.97 | -0.53 | -0.16 | 0.44  | -1.59 | -1.14 | -0.74 | -0.06 | -1.48 | -1.06 | -0.74 | -0.07 | -1.07 | -0.73 | -0.31 | 0.31  | 0.00 |
| Q9H791 | C5orf42 OS=Homo sapiens GN=C5orf42                                                                                                                                                                                                                  | 1 | -0.6 | -0.24 | -0.25 | -1.10 | -1.41 | -0.39 | -0.38 | -1.21 | -1.52 | -0.05 | 0.01  | -0.91 | -1.22 | 0.11  | 0.14  | -0.69 | -1.02 | 0.00 |
| Q96C1I | Probable ATP-dependent RNA helicase DHX58 OS=Homo sapiens GN=DHX58 PE=1 SV=1 - V-type proton ATPase subunit B, brain isoform OS=Homo sapiens GN=ATP6V1B2 PE=1                                                                                       | 1 | -0.6 | -0.60 | -1.41 | 0.37  | -0.63 | -1.41 | -2.19 | -0.40 | -1.39 | -1.01 | -1.74 | -0.03 | -1.03 | 0.26  | -0.51 | 1.29  | 0.27  | 0.01 |
| P21281 | Ig lambda chain V-II region BO OS=Homo sapiens PE=1 SV=1 - Ankyrin repeat and SOCS box protein 17 OS=Homo sapiens GN=ASB17 PE=2 SV=2 - Translation initiation factor eIF-2B subunit beta OS=Homo sapiens GN=EIF2B2 PE=1 SV=3 - Kinesin-like protein | 1 | -0.6 | -0.35 | -0.54 | -1.66 | -0.09 | -0.69 | -0.87 | -1.96 | -0.39 | -0.37 | -0.50 | -1.68 | -0.11 | 0.04  | -0.12 | -1.22 | 0.34  | 0.00 |
| P0171C | KIF1A OS=Homo sapiens GN=KIF1A PE=1                                                                                                                                                                                                                 | 1 | -0.6 | -0.69 | -0.25 | -0.91 | -1.59 | -0.46 | 0.15  | -0.42 | -0.76 | -0.37 | 0.22  | -0.59 | -0.49 | -0.79 | -0.39 | -1.30 | -1.54 | 0.00 |
| Q8WXQ1 | Eosinophil cationic protein OS=Homo sapiens GN=RNASE3 PE=1 SV=2                                                                                                                                                                                     | 1 | -0.6 | -0.36 | -1.19 | 0.00  | -2.27 | -0.12 | -0.93 | 0.27  | -1.99 | -0.14 | -1.00 | 0.14  | -2.07 | 0.43  | -0.37 | 0.83  | -1.44 | 0.02 |
| P4977C | Bloom syndrome protein OS=Homo sapiens GN=BLM PE=1 SV=1 - Carboxypeptidase N subunit 2 OS=Homo sapiens GN=CPN2 PE=1                                                                                                                                 | 1 | -0.6 | -1.89 | -1.11 | -1.27 | 0.54  | -1.59 | -0.79 | -0.93 | 0.89  | -0.97 | -0.12 | -0.35 | 1.46  | -2.01 | -1.20 | -1.35 | 0.45  | 0.02 |
| Q1275I | Zinc finger and SCAN domain-containing protein 18 OS=Homo sapiens GN=ZSCAN18 PE=2                                                                                                                                                                   | 1 | -0.6 | -0.25 | 0.38  | -0.38 | -0.13 | -0.86 | -0.21 | -0.95 | -0.69 | -1.47 | -0.77 | -1.59 | -1.34 | -0.69 | -0.03 | -0.77 | -0.53 | 0.00 |
| P12724 | Polymeric immunoglobulin receptor OS=Homo sapiens GN=PIGR PE=1 SV=4 - [PIGR_HUMAN]                                                                                                                                                                  | 1 | -0.6 | 0.05  | 0.18  | -2.02 | 0.48  | -0.15 | 0.00  | -2.19 | 0.33  | -0.53 | -0.33 | -2.60 | -0.09 | -0.51 | -0.35 | -2.53 | -0.04 | 0.03 |
| P5413Z | Reticulon-4 receptor-like 1 OS=Homo sapiens GN=RTN4RL1 PE=2                                                                                                                                                                                         | 1 | -0.6 | 0.16  | -0.28 | 0.44  | -0.98 | -0.90 | -1.32 | -0.58 | -2.00 | -0.86 | -1.23 | -0.57 | -2.00 | 0.24  | -0.16 | 0.58  | -0.86 | 0.00 |
| P2279Z | Codanin-1 OS=Homo sapiens GN=CDAN1 PE=1 SV=4 - Phosphoribosyl pyrophosphate synthase-associated protein 1 OS=Homo sapiens                                                                                                                           | 7 | -0.6 | -1.08 | -1.54 | -0.44 | -0.34 | -1.30 | -1.73 | -0.51 | -0.31 | -0.38 | -1.00 | -0.36 | -0.49 | -0.05 | -0.68 | -0.02 | -0.14 | 0.00 |
| Q8TBC1 | Structural maintenance of chromosomes protein 3 OS=Homo sapiens GN=SMC3 PE=1 SV=2 - ATP-dependent 6-phosphofructokinase, platelet type OS=Homo sapiens GN=PFKP PE=1                                                                                 | 1 | -0.7 | -1.71 | -1.40 | -1.36 | -1.46 | -0.62 | -0.28 | -0.22 | -0.32 | -0.44 | -0.06 | -0.08 | -0.19 | -0.83 | -0.48 | -0.42 | -0.54 | 0.00 |
| P0183E | Synctin-2 OS=Homo sapiens GN=ERVFRD-1 PE=1 SV=1 -                                                                                                                                                                                                   | 1 | -0.7 | -0.74 | -0.57 | -1.03 | -1.72 | -0.10 | 0.09  | -0.36 | -1.04 | -0.14 | -0.26 | -0.68 | -1.48 | -0.36 | -0.15 | -0.60 | -1.30 | 0.00 |
| Q86UN1 |                                                                                                                                                                                                                                                     | 1 | -0.7 | -1.23 | -0.43 | -1.06 | -1.96 | -1.68 | -0.87 | -1.48 | -2.37 | 0.09  | 0.95  | 0.26  | -0.64 | -0.10 | 0.73  | 0.12  | -0.79 | 0.02 |
| Q8IWF1 |                                                                                                                                                                                                                                                     | 2 | -0.7 | -0.99 | -1.72 | -0.29 | 0.68  | -1.14 | -1.85 | -0.40 | 0.58  | -1.04 | -1.70 | -0.34 | 0.63  | -1.02 | -1.42 | -0.27 | -0.40 | 0.01 |
| Q1455I |                                                                                                                                                                                                                                                     | 1 | -0.7 | -0.48 | -1.08 | -0.82 | -0.13 | -0.49 | -1.07 | -0.79 | -0.09 | -0.06 | -0.58 | -0.39 | 0.29  | -1.17 | -1.72 | -1.45 | -0.77 | 0.00 |
| Q9UQE1 |                                                                                                                                                                                                                                                     | 1 | -0.7 | -0.28 | 0.40  | -0.60 | -0.49 | -1.15 | -0.74 | -1.16 | -1.45 | -0.74 | -0.16 | -0.75 | -0.98 | -0.52 | -0.28 | -0.83 | -1.08 | 0.00 |
| Q01811 |                                                                                                                                                                                                                                                     | 1 | -0.7 | -1.11 | -1.57 | -2.02 | -0.25 | -0.54 | -0.98 | -1.40 | 0.37  | -0.74 | -1.13 | -1.64 | 0.13  | 0.06  | -0.36 | -0.79 | 0.97  | 0.00 |
| P6050E |                                                                                                                                                                                                                                                     | 1 | -0.7 | -1.84 | 0.07  | -1.23 | -1.11 | -0.77 | 1.16  | -0.12 | 0.00  | -1.13 | 0.86  | -0.51 | -0.39 | -2.38 | -0.43 | -1.71 | -1.61 | 0.01 |



|         |                                                                                                                                     |    |      |       |       |       |       |       |       |       |       |       |       |       |       |       |       |       |       |      |
|---------|-------------------------------------------------------------------------------------------------------------------------------------|----|------|-------|-------|-------|-------|-------|-------|-------|-------|-------|-------|-------|-------|-------|-------|-------|-------|------|
| Q9UJ4:  | Rab5 GDP/GTP exchange factor                                                                                                        | 1  | -0.7 | -0.25 | -0.33 | -2.66 | -0.71 | 0.03  | -0.03 | -2.34 | -0.38 | 0.13  | 0.12  | -2.27 | -0.32 | 0.14  | 0.09  | -2.22 | -0.28 | 0.01 |
| P1052:  | sapiens OS=Homo SV=3 - [ARRS_HUMAN]                                                                                                 | 1  | -0.7 | -0.64 | -0.10 | 0.20  | 0.64  | -1.87 | -1.32 | -1.00 | -0.55 | -1.36 | -0.75 | -0.52 | -0.08 | -1.68 | -1.11 | -0.79 | -0.36 | 0.00 |
| J8WXI:  | Mucin-16 OS=Homo sapiens GN=MUC16 PE=1 SV=2 - Absent in melanoma 1                                                                  | 2  | -0.7 | -1.95 | -0.49 | 1.15  | 0.00  | -2.98 | -1.50 | 0.16  | -0.98 | -2.89 | -1.36 | 0.22  | -0.94 | -1.61 | -0.11 | 1.55  | 0.39  | 0.05 |
| J9Y4K:  | protein OS=Homo sapiens GN=AIM1 PE=1 Serum amyloid A-2                                                                              | 1  | -0.7 | -1.23 | -0.79 | 0.16  | -0.10 | -1.02 | -0.56 | 0.41  | 0.15  | -1.96 | -1.45 | -0.57 | -0.84 | -1.69 | -1.21 | -0.25 | -0.52 | 0.00 |
| PODJE:  | protein OS=Homo sapiens GN=SAA2 PE=1 Golgi membrane protein                                                                         | 2  | -0.7 | 0.42  | 0.41  | -0.21 | -0.75 | 0.50  | 0.73  | -0.10 | -0.67 | -0.88 | -0.89 | -1.59 | -2.04 | -1.20 | -0.93 | -1.97 | -2.35 | 0.01 |
| J8NB3:  | 1 OS=Homo sapiens GN=GOLM1 PE=1 SV=1 - Testis-specific gene 10                                                                      | 2  | -0.7 | -0.36 | -1.24 | -1.10 | -0.59 | -0.21 | -1.07 | -0.90 | -0.39 | -0.10 | -0.92 | -0.83 | -0.33 | -0.46 | -1.31 | -1.14 | -0.65 | 0.00 |
| J9BZW:  | protein OS=Homo sapiens GN=TSGA10 Tudor and KH domain-containing protein                                                            | 1  | -0.7 | -1.73 | -2.04 | -0.62 | -0.25 | -1.78 | -2.07 | -0.63 | -0.26 | -1.44 | -1.68 | -0.32 | 0.05  | -0.33 | -0.61 | 0.83  | 1.19  | 0.01 |
| J9Y2W:  | OS=Homo sapiens GN=TDRKH PE=1 SV=2 A-kinase anchor protein                                                                          | 1  | -0.7 | 0.69  | -0.33 | 0.93  | 1.00  | -1.13 | -2.13 | -0.85 | -0.77 | -1.22 | -2.17 | -0.97 | -0.91 | -0.88 | -1.87 | -0.59 | -0.53 | 0.01 |
| Q1302:  | 6 OS=Homo sapiens GN=AKAP6 PE=1 SV=3 - Breast cancer anti-estrogen resistance protein 1 OS=Homo sapiens GN=BCAR1 Kanadaplin OS=Homo | 1  | -0.7 | -0.81 | -1.17 | 0.35  | -0.47 | -1.60 | -1.94 | -0.40 | -1.22 | -1.35 | -1.64 | -0.18 | -1.01 | -0.42 | -0.74 | 0.80  | -0.04 | 0.00 |
| P5694E: | protein 1 OS=Homo sapiens GN=BCAR1 Kanadaplin OS=Homo                                                                               | 1  | -0.7 | -1.24 | -0.91 | -0.44 | -0.71 | -0.56 | -0.21 | 0.28  | 0.01  | -2.12 | -1.71 | -1.31 | -1.58 | -0.80 | -0.43 | 0.06  | -0.23 | 0.00 |
| J9BWU:  | sapiens GN=SLC4A1AP PE=1 SV=1 - Ig heavy chain V-II                                                                                 | 1  | -0.8 | -0.61 | -0.22 | -0.29 | -0.33 | -0.82 | -0.41 | -0.46 | -0.49 | -0.67 | -0.21 | -0.34 | -0.39 | -2.00 | -1.59 | -1.63 | -1.69 | 0.00 |
| P0181E: | region COR OS=Homo sapiens PE=1 SV=1 - Histone H4 OS=Homo                                                                           | 1  | -0.8 | -0.56 | -0.31 | -0.76 | -3.07 | 0.40  | 0.79  | 0.34  | -1.95 | -0.67 | -0.48 | -0.90 | -3.31 | 0.17  | 0.42  | -0.01 | -2.33 | 0.03 |
| P6280E: | sapiens GN=HIST1H4A PE=1 SV=2 - Protein cereblon                                                                                    | 1  | -0.8 | -1.67 | -0.27 | -0.81 | 0.67  | -2.22 | -0.80 | -1.32 | 0.16  | -2.80 | -1.33 | -1.93 | -0.46 | -1.05 | 0.38  | -0.13 | 1.33  | 0.01 |
| J96SW:  | OS=Homo sapiens GN=CRBN PE=1 SV=1 - Histone-lysine N-methyltransferase                                                              | 1  | -0.8 | -0.13 | 0.50  | -0.89 | 0.87  | -1.17 | -0.51 | -1.89 | -0.12 | -1.53 | -0.83 | -2.28 | -0.53 | -1.20 | -0.53 | -1.90 | -0.15 | 0.00 |
| J9NR4:  | ASH1L OS=Homo sapiens GN=ASH1L Disks large homolog 2                                                                                | 2  | -0.8 | -0.05 | -3.45 | -0.20 | -0.51 | 0.39  | -2.98 | 0.28  | -0.02 | 0.05  | -3.28 | -0.10 | -0.41 | 0.45  | -2.91 | 0.35  | 0.03  | 0.05 |
| Q1570I: | OS=Homo sapiens GN=DLG2 PE=1 SV=3 - Laminin subunit alpha-4                                                                         | 1  | -0.8 | 0.08  | -0.09 | 0.82  | -2.38 | -0.74 | -0.90 | 0.03  | -3.17 | -0.36 | -0.46 | 0.38  | -2.83 | -0.28 | -0.42 | 0.51  | -2.71 | 0.03 |
| Q1636:  | OS=Homo sapiens GN=LAMA4 PE=1 SV=4 - Endothelial lipase                                                                             | 1  | -0.8 | -2.18 | -1.92 | -1.53 | -1.55 | -1.04 | -0.76 | -0.35 | -0.37 | -0.47 | -0.13 | 0.19  | 0.17  | -1.07 | -0.77 | -0.36 | -0.40 | 0.00 |
| J9Y5X:  | OS=Homo sapiens GN=LIPG PE=1 SV=1 - SET domain-containing                                                                           | 1  | -0.8 | -1.12 | -0.49 | -0.57 | -0.05 | -1.57 | -0.92 | -0.98 | -0.46 | -0.97 | -0.26 | -0.41 | 0.10  | -1.81 | -1.14 | -1.20 | -0.70 | 0.00 |
| J9C0A:  | protein 5 OS=Homo sapiens GN=SETD5 Nucleobindin-1 OS=Homo                                                                           | 1  | -0.8 | -0.30 | -0.88 | -0.45 | -1.28 | -0.05 | -0.61 | -0.16 | -0.98 | -0.32 | -0.83 | -0.46 | -1.29 | -0.87 | -1.42 | -0.96 | -1.81 | 0.00 |
| Q0281I: | sapiens GN=NUCB1 PE=1 SV=4 - BEN domain-containing                                                                                  | 1  | -0.8 | -1.75 | -1.26 | 0.22  | -0.02 | -2.74 | -2.45 | -0.95 | -0.97 | -1.97 | -1.58 | -0.35 | -0.43 | -0.59 | -0.19 | 1.20  | 0.83  | 0.01 |
| J8N7W:  | protein 7 OS=Homo sapiens GN=BEND7 Follistatin-related protein                                                                      | 1  | -0.8 | -1.05 | -1.09 | -1.60 | -0.16 | -0.73 | -0.74 | -1.24 | 0.21  | -0.70 | -0.67 | -1.25 | 0.19  | -1.15 | -1.16 | -1.65 | -0.22 | 0.00 |
| J8N47:  | 5 OS=Homo sapiens GN=FSTL5 PE=2 SV=2 - Proteoglycan 4                                                                               | 1  | -0.8 | 1.31  | 0.02  | -0.92 | -0.04 | -0.07 | -1.33 | -2.25 | -1.37 | 0.66  | -0.56 | -1.56 | -0.69 | -0.39 | -1.64 | -2.56 | -1.70 | 0.01 |
| J9295:  | OS=Homo sapiens GN=PRG4 PE=1 SV=2 -                                                                                                 | 16 | -0.8 | -1.21 | -1.54 | -0.21 | 0.09  | -1.90 | -2.36 | -1.22 | -0.62 | -1.78 | -1.85 | -0.58 | -0.42 | -0.29 | -0.79 | 0.60  | 0.97  | 0.00 |

|        |                                                                                                    |   |      |       |       |       |       |       |       |       |       |       |       |       |       |       |       |       |       |      |
|--------|----------------------------------------------------------------------------------------------------|---|------|-------|-------|-------|-------|-------|-------|-------|-------|-------|-------|-------|-------|-------|-------|-------|-------|------|
| Q9P2S1 | Ankyrin repeat and MYND domain-containing protein 1 OS=Homo sapiens GN=ANKMY1                      | 1 | -0.8 | -1.60 | -0.04 | 1.32  | -0.33 | -3.54 | -1.96 | -0.58 | -2.23 | -2.26 | -0.62 | 0.67  | -0.99 | -1.72 | -0.12 | 1.26  | -0.41 | 0.03 |
| P62502 | Epididymal-specific lipocalin-6 OS=Homo sapiens GN=LCN6 PE=1                                       | 1 | -0.8 | -0.68 | -1.82 | -2.00 | -1.00 | 0.18  | -0.94 | -1.11 | -0.09 | 0.41  | -0.66 | -0.90 | 0.10  | -0.51 | -1.62 | -1.78 | -0.79 | 0.00 |
| Y9BZD  | Kinetochores protein Nuf2 OS=Homo sapiens GN=NUF2 PE=1 SV=2 - Septin-2 OS=Homo                     | 1 | -0.8 | -1.05 | -0.28 | -1.07 | -0.25 | -0.99 | -0.20 | -0.97 | -0.15 | -1.79 | -0.95 | -1.80 | -0.99 | -1.10 | -0.30 | -1.07 | -0.26 | 0.00 |
| Q15011 | sapiens GN=SEPT2 PE=1 SV=1 - [SEPT2_HUMAN]                                                         | 1 | -0.8 | 0.16  | -0.46 | -1.65 | -1.99 | 0.31  | -0.28 | -1.45 | -1.78 | 0.52  | -0.02 | -1.27 | -1.62 | 0.15  | -0.44 | -1.60 | -1.96 | 0.00 |
| Y8ND2  | RING finger protein 214 OS=Homo sapiens GN=RNF214 PE=1 SV=2                                        | 1 | -0.8 | -0.20 | -0.64 | -1.63 | -0.67 | -0.59 | -1.01 | -1.98 | -1.02 | -0.09 | -0.46 | -1.52 | -0.57 | -0.20 | -0.61 | -1.58 | -0.64 | 0.00 |
| C60471 | Mannosyl-oligosaccharide 1,2-alpha-mannosidase IB OS=Homo sapiens GN=MAN1A2 PE=1                   | 1 | -0.8 | -1.36 | -1.56 | -0.62 | -0.18 | -1.38 | -1.56 | -0.59 | -0.15 | -1.25 | -1.38 | -0.49 | -0.06 | -1.18 | -1.34 | -0.37 | 0.05  | 0.00 |
| Q13571 | Ras GTPase-activating-like protein IQGAP2 OS=Homo sapiens GN=IQGAP2 PE=1 SV=4                      | 2 | -0.8 | -0.11 | -2.77 | -1.09 | -1.35 | 0.65  | -1.99 | -0.29 | -0.55 | 0.24  | -2.34 | -0.73 | -1.00 | 0.66  | -1.97 | -0.27 | -0.55 | 0.01 |
| P4332C | Beta-crystallin B2 OS=Homo sapiens GN=CRYBB2 PE=1                                                  | 1 | -0.8 | -0.02 | -2.07 | 0.04  | -1.81 | -0.69 | -1.78 | 0.32  | -1.50 | -0.97 | -2.01 | 0.01  | -1.82 | 0.60  | -1.42 | 0.68  | -1.16 | 0.00 |
| Q92731 | USP6 N-terminal-like protein OS=Homo sapiens GN=USP6NL                                             | 1 | -0.9 | 0.18  | -2.57 | -0.02 | -0.84 | -0.25 | -2.97 | -0.41 | -1.22 | -0.12 | -2.80 | -0.32 | -1.14 | 0.67  | -2.04 | 0.53  | -0.30 | 0.01 |
| Q13121 | RE1-silencing transcription factor OS=Homo sapiens                                                 | 2 | -0.9 | -0.03 | -0.12 | 0.63  | 0.22  | -1.49 | -2.41 | -0.79 | -1.20 | -1.62 | -1.39 | -0.95 | -1.37 | -1.06 | -0.95 | -0.35 | -0.78 | 0.00 |
| Y9P2G1 | Microtubule-associated protein 10 OS=Homo sapiens GN=MAP10                                         | 1 | -0.9 | -1.12 | -0.40 | -1.63 | -1.14 | -0.53 | 0.21  | -0.99 | -0.50 | 0.58  | 1.37  | 0.08  | 0.57  | -2.65 | -1.90 | -3.10 | -2.62 | 0.02 |
| Y9Y2D1 | Exocyst complex component 6B OS=Homo sapiens                                                       | 1 | -0.9 | -2.98 | -0.70 | -0.78 | -0.49 | -2.11 | 0.19  | -0.07 | 0.54  | -2.40 | -0.48 | -0.70 | -0.25 | -2.71 | -0.22 | -0.63 | -0.10 | 0.01 |
| Y8N9B  | Ankyrin repeat domain-containing protein 42 OS=Homo sapiens GN=ANKRD42 PE=2                        | 1 | -0.9 | 0.40  | 1.58  | 2.12  | 0.43  | -2.74 | -1.55 | -0.98 | -2.30 | -1.60 | -0.36 | 0.12  | -1.20 | -2.86 | -1.66 | -1.09 | -2.43 | 0.03 |
| P0104C | Cystatin-A OS=Homo sapiens GN=CSTA PE=1 SV=1 - [CYTA_HUMAN]                                        | 1 | -0.9 | -0.90 | -1.07 | -0.39 | -0.75 | -0.89 | -1.04 | -0.34 | -0.69 | -0.30 | -0.39 | 0.22  | -0.14 | -2.02 | -2.16 | -1.46 | -1.83 | 0.00 |
| Y96LW  | DNA-directed primase/polymerase protein OS=Homo sapiens GN=PRIMPOL                                 | 1 | -0.9 | 0.21  | -1.08 | -1.75 | -0.40 | 0.49  | -0.79 | -1.43 | -0.08 | 0.21  | -1.01 | -1.74 | -0.40 | -0.82 | -2.08 | -2.72 | -1.39 | 0.00 |
| P2996E | CD40 ligand OS=Homo sapiens GN=CD40LG PE=1 SV=1 -                                                  | 1 | -0.9 | -0.82 | -0.64 | 0.09  | -0.35 | -1.45 | -1.25 | -0.50 | -0.94 | -1.29 | -1.04 | -0.37 | -0.83 | -1.83 | -1.61 | -0.86 | -1.32 | 0.00 |
| Q12911 | Receptor-type tyrosine-protein phosphatase eta OS=Homo sapiens GN=PTPRJ PE=1 SV=3 -                | 1 | -0.9 | -2.35 | -2.54 | 0.28  | 0.14  | -2.84 | -3.00 | -0.17 | -0.30 | -3.41 | -3.14 | -0.56 | -1.13 | -0.29 | -0.44 | 2.40  | 2.24  | 0.05 |
| P09884 | DNA polymerase alpha catalytic subunit OS=Homo sapiens GN=POLA1 PE=1 SV=2 -                        | 1 | -0.9 | -1.09 | -2.46 | -0.37 | 0.23  | -1.92 | -3.27 | -1.16 | -0.55 | -1.35 | -2.65 | -0.63 | -0.03 | -0.18 | -1.52 | 0.59  | 1.18  | 0.01 |
| Y9NP71 | Putative bifunctional UDP-N-acetylglucosamine transferase and deubiquitinase ALG13 OS=Homo sapiens | 1 | -1.0 | -0.30 | -1.17 | -1.29 | -0.23 | -0.25 | -1.10 | -1.20 | -0.14 | -0.16 | -0.95 | -1.14 | -0.09 | -1.50 | -2.33 | -2.44 | -1.39 | 0.00 |
| Y3SYG1 | Protein PTHB1 OS=Homo sapiens GN=BBS9 PE=1 SV=1 -                                                  | 2 | -1.0 | -0.44 | -0.90 | -1.34 | 0.33  | -0.67 | -1.21 | -1.56 | -0.08 | -0.86 | -1.48 | -1.99 | -0.32 | -1.19 | -1.65 | -1.99 | -0.41 | 0.00 |
| Y9NQ31 | Serine protease inhibitor Kazal-type 5 OS=Homo sapiens GN=SPINK5 PE=1 SV=2 -                       | 1 | -1.0 | -0.34 | -0.44 | -2.18 | -1.47 | -0.31 | -0.39 | -2.11 | -1.39 | -0.09 | -0.12 | -1.92 | -1.21 | -0.22 | -0.29 | -2.00 | -1.31 | 0.00 |

|        |                                                                                                                                                                                                                                             |   |      |       |       |       |       |       |       |       |       |       |       |       |       |       |       |       |       |      |
|--------|---------------------------------------------------------------------------------------------------------------------------------------------------------------------------------------------------------------------------------------------|---|------|-------|-------|-------|-------|-------|-------|-------|-------|-------|-------|-------|-------|-------|-------|-------|-------|------|
| Q9H2F1 | 3 beta-hydroxysteroid dehydrogenase type 7 OS=Homo sapiens GN=HSD3B7 PE=1 SV=2                                                                                                                                                              | 1 | -1.0 | 0.59  | -1.62 | -2.86 | -1.50 | 0.46  | -1.74 | -2.96 | -1.59 | 1.80  | -0.34 | -1.64 | -0.28 | 0.79  | -1.38 | -2.60 | -1.25 | 0.01 |
| O60311 | Germinal-center associated nuclear protein OS=Homo sapiens GN=MCM3AP                                                                                                                                                                        | 1 | -1.0 | -3.62 | -0.81 | -0.45 | -0.33 | -2.52 | -0.98 | -0.42 | -0.44 | -3.39 | -0.87 | -0.46 | 0.14  | -3.02 | 0.03  | 0.44  | 0.54  | 0.01 |
| O15071 | Centrosomal protein of 290 kDa OS=Homo sapiens GN=CEP290                                                                                                                                                                                    | 1 | -1.0 | -0.26 | -0.37 | -0.75 | -0.26 | -2.00 | -2.09 | -2.45 | -1.96 | -0.21 | -0.26 | -0.70 | -0.22 | -1.09 | -1.17 | -1.52 | -1.05 | 0.00 |
| P11532 | Dystrophin OS=Homo sapiens GN=DMD PE=1 SV=3 - [DMD_HUMAN]                                                                                                                                                                                   | 2 | -1.0 | 0.00  | -1.38 | -2.97 | -0.84 | 0.12  | -1.25 | -2.82 | -0.69 | 0.96  | -0.36 | -2.01 | 0.11  | -0.04 | -1.39 | -2.96 | -0.85 | 0.00 |
| P07197 | Neurofilament medium polypeptide OS=Homo sapiens GN=NEFM PE=1 SV=3 - [NFM_HUMAN]                                                                                                                                                            | 1 | -1.1 | -1.04 | -1.69 | -2.61 | -0.22 | 0.29  | -0.34 | -1.24 | 1.16  | -1.49 | -2.07 | -3.05 | -0.66 | -0.65 | -1.27 | -2.16 | 0.21  | 0.00 |
| P09017 | Homeobox protein Hox-C4 OS=Homo sapiens GN=HOXC4 PE=1 SV=2 - Macrophage-expressed gene 1 protein OS=Homo sapiens GN=MPEG1 PE=2 SV=1 - Methionine synthase OS=Homo sapiens GN=MTR PE=1 SV=2 - Myosin-14 OS=Homo sapiens GN=MYH14 PE=1 SV=2 - | 1 | -1.1 | 1.18  | -2.34 | -0.89 | -0.18 | 0.31  | -3.19 | -1.73 | -1.00 | 1.28  | -2.17 | -0.78 | -0.07 | -0.11 | -3.60 | -2.13 | -1.43 | 0.01 |
| Q2M38  | Centrosomal protein of 162 kDa OS=Homo sapiens GN=CEP162                                                                                                                                                                                    | 1 | -1.1 | -1.63 | -4.31 | -0.97 | -0.93 | -1.30 | -3.96 | -0.60 | -0.56 | -0.54 | -3.15 | 0.14  | 0.16  | 0.47  | -2.18 | 1.19  | 1.21  | 0.02 |
| Q99701 | Myosin-IIIa OS=Homo sapiens GN=MYO3A PE=2 SV=2 - Putative V-set and immunoglobulin domain-containing-like protein OS=Homo sapiens GN=IGHV4OR15-8 OS=Homo sapiens GN=IGHV4OR15-                                                              | 2 | -1.1 | -1.36 | -0.74 | -1.26 | -0.91 | -1.40 | -0.76 | -1.26 | -1.37 | -0.68 | 0.01  | -0.57 | -0.47 | -2.03 | -1.38 | -1.87 | -0.94 | 0.00 |
| Q7Z401 | Immunoglobulin superfamily member 3 OS=Homo sapiens GN=IGSF3 PE=2 SV=3 - cGMP-dependent protein kinase 2 OS=Homo sapiens GN=PRKG2                                                                                                           | 1 | -1.1 | 0.30  | -1.02 | -2.49 | -2.05 | 0.84  | -0.47 | -1.92 | -1.47 | 0.71  | -0.55 | -2.08 | -1.65 | 0.29  | -1.00 | -2.45 | -2.02 | 0.00 |
| Q5TB8  | Immunoglobulin superfamily member 3 OS=Homo sapiens GN=IGSF3 PE=2 SV=3 - cGMP-dependent protein kinase 2 OS=Homo sapiens GN=PRKG2                                                                                                           | 3 | -1.1 | -0.21 | -4.55 | -3.10 | 1.06  | 0.16  | -2.18 | -3.19 | 0.97  | 0.35  | -0.61 | -2.96 | 1.19  | 0.19  | -2.13 | -3.40 | 0.74  | 0.04 |
| Q8NEV1 | Immunoglobulin superfamily member 3 OS=Homo sapiens GN=IGSF3 PE=2 SV=3 - cGMP-dependent protein kinase 2 OS=Homo sapiens GN=PRKG2                                                                                                           | 1 | -1.1 | -0.58 | -4.35 | -1.10 | 0.60  | 0.46  | -3.29 | -0.02 | 1.68  | 0.23  | -3.47 | -0.28 | 1.41  | -1.51 | -5.25 | -1.98 | -0.30 | 0.05 |
| A6NJI1 | Immunoglobulin superfamily member 3 OS=Homo sapiens GN=IGSF3 PE=2 SV=3 - cGMP-dependent protein kinase 2 OS=Homo sapiens GN=PRKG2                                                                                                           | 2 | -1.1 | -1.18 | -1.72 | -2.73 | -1.19 | -0.74 | -1.21 | -2.16 | -0.94 | 0.02  | -0.49 | -1.45 | 0.03  | -0.48 | -1.17 | -2.06 | -0.57 | 0.00 |
| O75051 | Immunoglobulin superfamily member 3 OS=Homo sapiens GN=IGSF3 PE=2 SV=3 - cGMP-dependent protein kinase 2 OS=Homo sapiens GN=PRKG2                                                                                                           | 1 | -1.2 | 1.85  | 1.98  | 0.16  | 2.09  | -1.94 | -1.79 | -3.59 | -1.65 | -1.26 | -1.06 | -2.95 | -1.01 | -2.01 | -1.85 | -3.65 | -1.73 | 0.02 |
| Q13231 | Immunoglobulin superfamily member 3 OS=Homo sapiens GN=IGSF3 PE=2 SV=3 - cGMP-dependent protein kinase 2 OS=Homo sapiens GN=PRKG2                                                                                                           | 1 | -1.2 | -0.56 | -0.96 | -0.59 | 0.18  | -2.39 | -2.77 | -2.38 | -1.60 | -2.06 | -2.39 | -2.08 | -1.31 | -0.01 | -0.37 | 0.02  | 0.78  | 0.00 |
| P20742 | Pregnancy zone protein OS=Homo sapiens GN=PZP PE=1 SV=4 - DENN domain-containing protein 5A OS=Homo sapiens GN=DENND5A PE=1 SV=2 -                                                                                                          | 1 | -1.2 | 0.06  | -1.65 | -1.50 | -1.87 | 0.94  | -0.75 | -0.58 | -0.94 | 0.52  | -1.12 | -1.03 | -1.41 | -1.11 | -2.78 | -2.61 | -3.00 | 0.00 |
| Q61Q21 | Inositol 1,4,5-trisphosphate receptor type 3 OS=Homo sapiens GN=ITPR3 PE=1 SV=5 -                                                                                                                                                           | 2 | -1.2 | -0.97 | -2.35 | -0.61 | -0.45 | -2.41 | -1.48 | -0.11 | -0.76 | -1.18 | -2.48 | -0.80 | -0.66 | -1.05 | -2.40 | -0.63 | -0.49 | 0.00 |
| Q14571 | Inositol 1,4,5-trisphosphate receptor type 3 OS=Homo sapiens GN=ITPR3 PE=1 SV=5 -                                                                                                                                                           | 1 | -1.2 | -0.59 | -2.94 | -0.39 | -0.48 | -0.85 | -3.43 | -1.31 | -0.78 | -0.56 | -2.88 | -0.83 | -0.65 | -0.47 | -2.93 | -0.43 | -0.16 | 0.00 |
| Q14181 | Double C2-like domain-containing protein alpha OS=Homo sapiens GN=DOC2A PE=1 SV=5 -                                                                                                                                                         | 1 | -1.2 | -0.34 | -1.61 | -0.44 | -2.23 | -0.28 | -1.53 | -0.34 | -2.12 | -0.37 | -1.57 | -0.46 | -2.26 | -0.78 | -2.01 | -0.82 | -2.63 | 0.00 |
| Q9UPU1 | TBC1 domain family member 2B OS=Homo sapiens GN=TBC1D2B                                                                                                                                                                                     | 1 | -1.2 | -3.63 | -0.07 | -0.16 | -0.49 | -4.53 | -0.95 | -1.02 | -1.34 | -3.45 | 0.18  | 0.03  | -0.30 | -3.64 | -0.04 | -0.11 | -0.45 | 0.01 |
| Q8IZT1 | Protein FAM9C OS=Homo sapiens GN=FAM9C PE=2 SV=1 -                                                                                                                                                                                          | 1 | -1.3 | -0.74 | -2.08 | -1.30 | -0.86 | -1.15 | -2.48 | -1.67 | -1.23 | -0.85 | -2.12 | -1.40 | -0.97 | -0.36 | -1.67 | -0.87 | -0.44 | 0.00 |

|        |                                                                                                         |   |      |       |       |       |       |       |       |       |       |       |       |       |       |       |       |       |       |      |
|--------|---------------------------------------------------------------------------------------------------------|---|------|-------|-------|-------|-------|-------|-------|-------|-------|-------|-------|-------|-------|-------|-------|-------|-------|------|
| P5707E | Ubiquitin-associated and SH3 domain-containing protein A OS=Homo sapiens GN=UBASH3A                     | 1 | -1.3 | -4.33 | -0.66 | -0.20 | -1.46 | -3.97 | -0.28 | 0.20  | -1.06 | -2.93 | 0.81  | 1.21  | -0.06 | -4.59 | -0.89 | -0.40 | -1.68 | 0.01 |
| Q92977 | Transportin-1 OS=Homo sapiens GN=TNPO1                                                                  | 1 | -1.3 | -3.14 | -0.80 | -1.50 | -0.72 | -2.60 | -0.25 | -0.93 | -0.14 | -2.79 | -0.38 | -1.14 | -0.36 | -3.20 | -0.83 | -1.51 | -0.74 | 0.00 |
| Q96AN  | Transmembrane protein 143 OS=Homo sapiens GN=TMEM143 PE=2                                               | 1 | -1.3 | -5.74 | -1.47 | -0.69 | -0.22 | -5.09 | -0.80 | -0.01 | 0.47  | -4.60 | -0.26 | 0.45  | 0.92  | -4.77 | -0.46 | 0.33  | 0.79  | 0.04 |
| Q5JW9I | Protein FAM26D OS=Homo sapiens GN=FAM26D PE=1                                                           | 1 | -1.3 | 0.09  | 0.87  | -4.47 | -0.27 | -0.41 | 0.40  | -4.92 | -0.72 | -0.47 | 0.39  | -5.02 | -0.83 | -0.52 | 0.30  | -5.02 | -0.84 | 0.03 |
| Q2M38  | WASH complex subunit 7 OS=Homo sapiens GN=KIAA1033 PE=1                                                 | 1 | -1.3 | 0.02  | -3.62 | -1.53 | -0.76 | 0.05  | -3.58 | -1.47 | -0.70 | 0.54  | -3.03 | -1.00 | -0.24 | -0.08 | -3.69 | -1.58 | -0.82 | 0.00 |
| O14777 | Tripeptidyl-peptidase 1 OS=Homo sapiens GN=TPP1 PE=1 SV=2 -                                             | 1 | -1.4 | -2.50 | -1.09 | -2.04 | -1.98 | -1.55 | -0.05 | -1.03 | -0.87 | -1.82 | -0.43 | -1.36 | -1.30 | -2.11 | -0.50 | -1.49 | -1.55 | 0.00 |
| Q8NBU  | ATPase family AAA domain-containing protein 1 OS=Homo sapiens GN=ATAD1 PE=1 SV=1 -                      | 1 | -1.4 | -0.87 | -2.32 | -1.08 | -0.52 | -1.38 | -2.81 | -1.55 | -0.99 | -0.52 | -1.91 | -0.73 | -0.18 | -1.52 | -2.95 | -1.68 | -1.14 | 0.00 |
| Q81YJ1 | Copine-9 OS=Homo sapiens GN=CPNE9 PE=1 SV=3 -                                                           | 1 | -1.4 | -0.36 | -1.94 | -1.59 | 0.38  | -1.07 | -2.63 | -2.26 | -0.29 | -1.66 | -3.17 | -2.87 | -0.92 | -0.45 | -2.00 | -1.62 | 0.32  | 0.00 |
| Q9275r | Transcription factor AP-2 gamma OS=Homo sapiens GN=TFAP2C                                               | 1 | -1.4 | -1.21 | -2.31 | -1.31 | -1.57 | -1.25 | -2.33 | -1.31 | -1.57 | -0.47 | -1.50 | -0.56 | -0.83 | -1.24 | -2.31 | -1.29 | -1.57 | 0.00 |
| P01814 | Ig heavy chain V-II region OU OS=Homo sapiens PE=1 SV=1 -                                               | 1 | -1.5 | -2.42 | 2.57  | -0.61 | -1.62 | -4.74 | 0.26  | -2.89 | -3.90 | -1.33 | 3.72  | 0.48  | -0.54 | -5.08 | -0.06 | -3.22 | -4.25 | 0.03 |
| Q43447 | Peptidyl-prolyl cis-trans isomerase H OS=Homo sapiens GN=PPIH PE=1                                      | 1 | -1.5 | -0.11 | -2.52 | -1.97 | -0.96 | -0.12 | -2.51 | -1.94 | -0.93 | -0.29 | -2.63 | -2.14 | -1.14 | -0.39 | -2.77 | -2.19 | -1.20 | 0.00 |
| P3840E | Guanine nucleotide-binding protein G(olf) subunit alpha OS=Homo sapiens GN=GNAL PE=1                    | 1 | -1.5 | 0.34  | -4.04 | -3.14 | 0.03  | -0.40 | -4.76 | -3.84 | -0.66 | 0.61  | -3.70 | -2.86 | 0.31  | 1.43  | -2.92 | -2.00 | 1.16  | 0.01 |
| P5576E | NHP2-like protein 1 OS=Homo sapiens GN=NHP2L1 PE=1 SV=3                                                 | 1 | -1.5 | -0.97 | -5.52 | -2.33 | -1.11 | 0.37  | -4.16 | -0.96 | 0.27  | -0.23 | -4.71 | -1.58 | -0.37 | 0.64  | -3.87 | -0.67 | 0.54  | 0.01 |
| Q9UJA1 | tRNA (adenine(58)-N(1))-methyltransferase non-catalytic subunit TRM6 OS=Homo sapiens GN=TRMT6 PE=1 SV=1 | 1 | -1.6 | -1.47 | -3.17 | -1.08 | -0.55 | -1.44 | -3.11 | -1.01 | -0.47 | -1.41 | -3.04 | -1.02 | -0.49 | -1.79 | -3.45 | -1.35 | -0.83 | 0.00 |
| Q86VI1 | Ras GTPase-activating-like protein IQGAP3 OS=Homo sapiens GN=IQGAP3 PE=1 SV=2                           | 1 | -1.6 | 1.98  | -2.08 | -0.50 | 1.39  | -0.98 | -5.01 | -3.41 | -1.52 | 0.14  | -3.84 | -2.32 | -0.44 | -0.58 | -4.60 | -3.00 | -1.13 | 0.01 |
| Q60932 | Nibrin OS=Homo sapiens GN=NBN PE=1 SV=1 -                                                               | 1 | -1.6 | -1.61 | -0.67 | -0.83 | -5.98 | -0.93 | 0.03  | -0.11 | -5.26 | -1.14 | -0.13 | -0.35 | -5.51 | -0.30 | 0.67  | 0.53  | -4.63 | 0.01 |
| Q5JR5I | Microtubule-associated tumor suppressor candidate 2 OS=Homo sapiens GN=MTUS2                            | 2 | -1.7 | -0.90 | -4.33 | -2.38 | -1.21 | -0.58 | -3.99 | -2.03 | -1.06 | 0.39  | -2.97 | -1.09 | 0.09  | -0.34 | -3.74 | -1.77 | -0.82 | 0.00 |
| Q9H84I | Acyl-CoA dehydrogenase family member 9, mitochondrial OS=Homo sapiens GN=ACAD9                          | 1 | -1.7 | -1.72 | -0.86 | -1.60 | -1.85 | -2.64 | -1.76 | -2.48 | -2.73 | -1.27 | -0.34 | -1.14 | -1.40 | -2.01 | -1.12 | -1.83 | -2.10 | 0.00 |
| Q9NZV  | Potassium voltage-gated channel subfamily D member 2 OS=Homo sapiens GN=KCND2                           | 1 | -1.8 | -0.91 | -2.23 | -2.95 | -0.92 | -0.87 | -2.17 | -2.87 | -0.84 | -0.96 | -2.21 | -2.99 | -0.97 | -1.11 | -2.40 | -3.09 | -1.08 | 0.00 |
| Q9H3D  | Tumor protein 63 OS=Homo sapiens GN=TP63 PE=1 SV=1 -                                                    | 1 | -1.8 | -5.20 | -1.63 | -0.23 | -0.67 | -5.45 | -1.86 | -0.44 | -0.87 | -4.53 | -0.89 | 0.44  | 0.01  | -5.27 | -1.67 | -0.24 | -0.69 | 0.00 |
| Q13737 | Sodium/potassium-transporting ATPase subunit alpha-4 OS=Homo sapiens                                    | 1 | -2.1 | -4.49 | -2.95 | -2.81 | -2.68 | -2.94 | -1.38 | -1.23 | -1.08 | -2.71 | -1.10 | -1.02 | -0.89 | -3.25 | -1.68 | -1.52 | -1.40 | 0.00 |

Kinesin-like protein  
Q8NI7. KIF18A OS=Homo  
sapiens GN=KIF18A

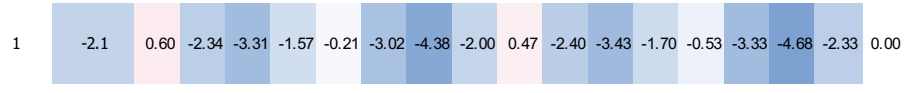











0.82741193
